1 **TMC1 Confers a Leak Conductance to Modulate Excitability of Auditory Hair Cells**  
2 **in Mammals**

3

4 **Shuang Liu<sup>1,2,3</sup>, Shufeng Wang<sup>1,2,3</sup>, Linzhi Zou<sup>1,2,3</sup>, Jie Li<sup>1,2</sup>, Chenmeng Song<sup>1,2</sup>, Jiaofeng Chen<sup>1,2</sup>,**  
5 **Qun Hu<sup>1,2</sup>, Lian Liu<sup>1,2</sup>, Wei Xiong<sup>1,2,\*</sup>**

6 <sup>1</sup>School of Life Sciences,

7 <sup>2</sup>IDG/McGovern Institute for Brain Research at Tsinghua University,

8 Tsinghua University, Beijing 100084, China

9

10 <sup>3</sup>These authors contributed equally

11

12 \*Corresponding Author

13 Wei Xiong, Ph.D.

14 School of Life Sciences

15 IDG/McGovern Institute for Brain Research at Tsinghua University

16 Tsinghua University

17 1 Qinghuayuan

18 Beijing 100084, China

19 Office: +86-10-62792464

20 Email: wei\_xiong@tsinghua.edu.cn

21

22 **ABSTRACT**

23 Hearing sensation relies on the mechano-electrical transducer (MET) channel of cochlear hair cells, in  
24 which Transmembrane channel-like 1 (TMC1) and TMC2 have been proposed to be the pore-forming  
25 subunits. Meanwhile it has been reported that TMCs regulate other biological processes in a variety of  
26 lower organisms ranging from sensations to motor functions. However, it is still an open question whether  
27 TMCs play roles other than their function in MET in mammals. In this study, we report that in mouse hair  
28 cells TMC1, but not TMC2, provides a background leak conductance, with properties distinct from those  
29 of the MET channels. By cysteine substitution, 4 amino acids of TMC1 are characterized critical for the  
30 leak conductance. The leak conductance is essential for action potential firing and tonotopic along the  
31 cochlear coil. Taken together, our results suggest that TMC1 confers a background leak conductance that  
32 modulates membrane excitability in cochlear hair cells.

33

34 **KEYWORDS**

35 Cochlea, Hair cell, Mechanotransduction, TMC1, Leak, Channel, Conductance, Tonotopy

## 36 INTRODUCTION

37 Hair cells are mechanoreceptors that convert mechanical stimuli provided by sound and acceleration into  
38 electrical signals. In the snail-shaped mammalian cochlea, hair cells are organized into three rows of outer  
39 hair cells (OHCs) and one row of inner hair cells (IHCs) that run along the length of the cochlear duct.  
40 The cochlea is tonotopically organized, where hair cells at the base of the cochlea represent high-frequency  
41 sounds and hair cells at the apex represent low-frequency sounds with a gradient in between. OHCs  
42 amplify input sound signals while IHCs transmit sound information to the CNS.

43 The mechanotransduction complex in cochlear hair cells consists of a multitude of proteins including  
44 ion-channel subunits, cell adhesion proteins, myosin motors, and scaffolding proteins that are critical to  
45 sense sound-induced force (Xiong and Xu, 2018). The transmembrane proteins TMC1 (transmembrane  
46 channel-like 1), TMC2, LHFPL5 (lipoma HMGIC fusion partner-like 5 / also known as tetraspan  
47 membrane protein of hair cell stereocilia, TMHS), and TMIE (transmembrane inner ear expressed protein),  
48 are thought to be integral components of the MET channels in hair cells. TMC1 and TMC2 have been  
49 proposed to be the pore-forming subunits of the MET channel in hair cells (Ballesteros et al., 2018; Corey  
50 and Holt, 2016; Kawashima et al., 2015; Pan et al., 2018). Consistent with this model, MET currents are  
51 absent in hair cells from mice lacking both TMC1 and TMC2 (Kawashima et al., 2011), while the unitary  
52 conductance, permeability, and ion selectivity of the MET channel differs between hair cells expressing  
53 only TMC1 or TMC2 (Beurg et al., 2015a; Beurg et al., 2014; Corns et al., 2017; Corns et al., 2014, 2016;  
54 Kim and Fettiplace, 2013; Pan et al., 2013). Finally, cysteine mutagenesis experiments are consistent with  
55 the model that it is a pore-forming subunit of the hair-cell MET channel (Pan et al., 2018). However, all  
56 efforts have so far failed to express TMC proteins in heterologous cells to reconstitute ion channel function

57 (Corey and Holt, 2016; Wu and Muller, 2016). Intriguingly, MET responses in OHCs vary tonotopically,  
58 and a lack of TMC1 and LHFPL5 but not TMC2 abolishes the tonotopic gradient in the MET response  
59 (Beurg et al., 2014; Beurg et al., 2015b). While changes in the levels of expression of TMC1 from the base  
60 to the apex have been proposed to underlie the tonotopic gradient in the MET response, the mechanisms  
61 that cause the tonotopic gradient are not completely defined (Beurg et al., 2018; Beurg et al., 2006; Ricci  
62 et al., 2003; Waguespack et al., 2007).

63 TMC orthologues in other species have been linked to a diversity of functions. In *Drosophila*  
64 *melanogaster*, TMC is expressed in the class I and class II dendritic arborization neurons and bipolar  
65 dendrite neurons that are critical for larval locomotion (Guo et al., 2016), and TMC is enriched in md-L  
66 neurons that sense food texture (Zhang et al., 2016), and for proprioceptor-mediated direction selectivity  
67 (He et al., 2019). In *Caenorhabditis elegans*, TMC-1 regulates development and sexual behavior (Zhang  
68 et al., 2015), and is required for the alkaline sensitivity of ASH nociceptive neurons (Wang et al., 2016).  
69 While efforts have failed to demonstrate that TMCs in flies and worms are mechanically-gated ion  
70 channels, recent mechanistic studies in worms have shown that TMC-1 and TMC-2 regulate membrane  
71 excitability and egg-laying behavior by conferring a leak conductance (Yue et al., 2018). This raises the  
72 question of whether mammalian TMC1 and 2 only function as components of mechanically-gated ion  
73 channels or play additional roles that are critical for mechanosensory hair cell function.

74 In this study, we therefore set out to determine the non-MET functions of TMCs and to tackle its link  
75 with hair-cell function, by applying approaches to manipulate TMCs and monitor membrane excitability  
76 in mouse hair cells. We seek potential molecular and cellular mechanisms underlying TMCs and the  
77 correlated relevance in auditory transduction.

78

## 79 **RESULTS**

### 80 **TMC1 but not TMC2 mediates a background current in hair cells**

81 During whole-cell patch-clamp recordings from hair cells (Figure 1A, mostly P6 apical-middle OHCs if  
82 not specified otherwise) in regular Na<sup>+</sup>-containing external solution (144 mM), we always recorded a  
83 significant membrane current ( $I_m$ , 72.69 pA on average) (Figure 1B,C, left). When Na<sup>+</sup> was replaced in  
84 the external solution by N-methyl-D-glucamine (NMDG<sup>+</sup>) (144 mM), the  $I_m$  was undetectable (Figure 1B,  
85 left), demonstrating that this significant background current is carried by an ion channel in the cell  
86 membrane. When reperfused with regular external solution, the current baseline returned to “leaky” status  
87 (Figure 1B, left). However, the  $I_m$  was markedly diminished in *Tmc1*-knockout OHCs (Figure 1B,C, right).  
88 For more accurate quantification, the amplitude of the background current ( $I_{BG}$ ) was calculated by  
89 subtracting the current baseline in NMDG<sup>+</sup> solution from that in Na<sup>+</sup> solution (Figure 1D). On average,  
90 the  $I_{BG}$  in wild-type OHCs was 70.53 pA, while it was drastically reduced to 17.84 pA in *Tmc1*-knockout  
91 OHCs (Figure 1D). A more detailed analysis of the  $I_{BG}$  was carried out by applying a series of pulse  
92 stimulations to hair cells (Figure 1E-G). The IV curves obtained from these measurements verified a  
93 greatly diminished membrane current in *Tmc1*-knockout OHCs (Figure 1E,F). By subtraction, it was clear  
94 that the inward  $I_{BG}$  was dramatically reduced in *Tmc1*-knockout OHCs (Figure 1G).

95

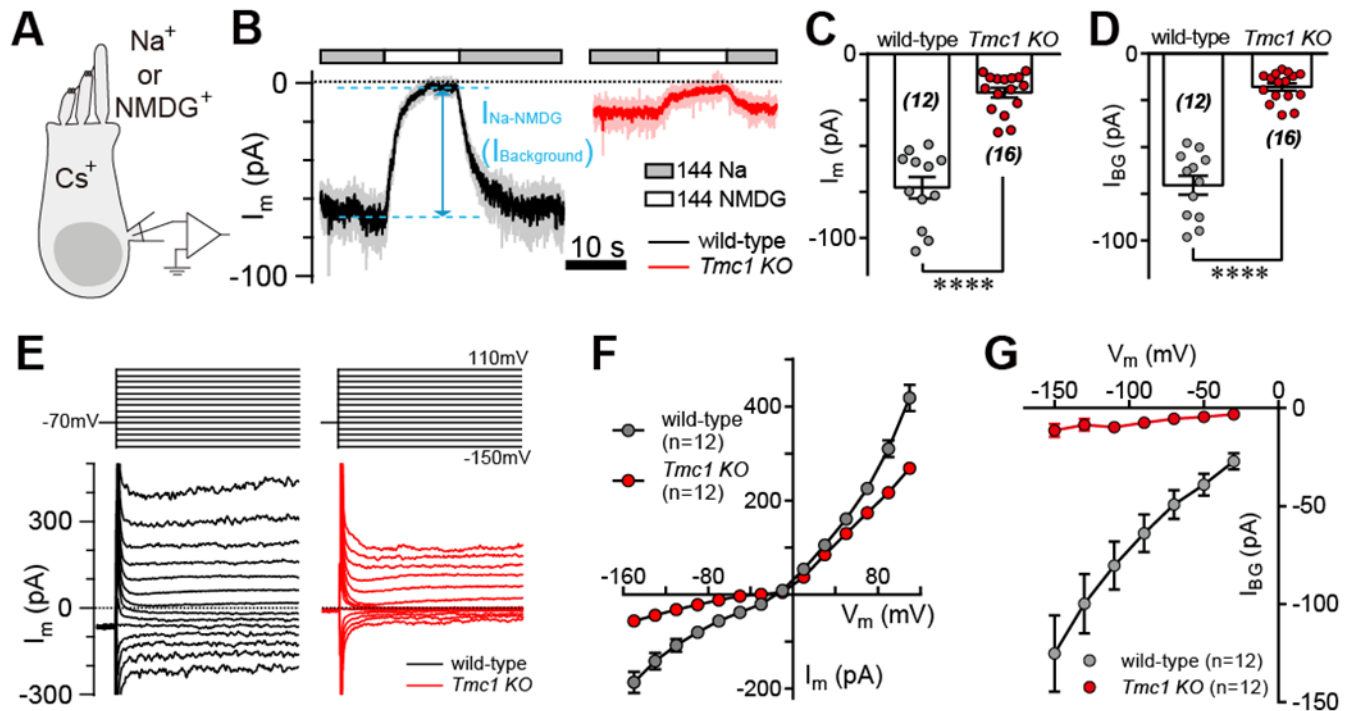

**Figure 1. TMC1 mediates a background current in hair cells**

(A) Diagram of the recording configuration. The P6 outer hair cells (OHCs) were whole-cell patch-clamped with Cs<sup>+</sup> in the recording electrode and perfused with different external solutions. (B) Representative traces of membrane current ( $I_m$ ) in OHCs from wild-type and *Tmc1*-knockout (*Tmc1 KO*) mice. 144 Na, regular recording solution; 144 NMDG, Na<sup>+</sup> substituted with NMDG<sup>+</sup>. (C and D) Statistics of the  $I_m$  (C) and  $I_{Background}$  ( $I_{BG}$ , D) from recordings similar to (B).  $I_{BG}$  was calculated by subtraction of  $I_m$  in 144 Na and 144 NMDG, as indicated in (B). Wild-type  $I_m$ ,  $-72.69 \pm 5.79$  pA, *Tmc1*-knockout  $I_m$ ,  $-20.96 \pm 2.70$  pA; wild-type  $I_{BG}$ ,  $-70.53 \pm 5.11$  pA, *Tmc1*-knockout  $I_{BG}$ ,  $-17.84 \pm 1.98$  pA. (E) Example of  $I_m$  in OHCs undergoing a series of membrane depolarizations from wild-type (black) and *Tmc1*-knockout (red) mice. (F and G) Statistics of  $I_m$  (F) and  $I_{BG}$  (G) of I-V recordings similar to (E). The external solution contained 1.3 mM Ca<sup>2+</sup>. The holding potential was -70 mV. Data are presented as mean  $\pm$  SEM. \* $p < 0.05$ , \*\* $p < 0.01$ , \*\*\* $p < 0.001$ , Student's t-test.

We next considered whether overexpression of TMC1 would enhance the background current in wild-type hair cells. Three constructs were used for these experiments: enhanced green fluorescent protein (EGFP), wild-type TMC1 (*Tmc1*\_WT), and TMC1 deafness (*Tmc1*\_dn) carrying a deletion mutation linked to deafness. Using cochlear injectoporation (Xiong et al., 2014), these constructs were delivered into OHCs on postnatal day 3 (P3). The cells were cultured for 1 day *in vitro* (1DIV) and then analyzed by immunostaining (Figure 2A) and patch-clamp recording (Figure 2B). As revealed by HA

114 antibody, exogenously expressed TMC1 largely distributed in soma of OHCs (Figure 2A), consistent with  
 115 previous observation (Kawashima et al., 2011). While overexpression of the EGFP control and *Tmc1\_dn*  
 116 did not affect the  $I_{BG}$  (17.56 pA and 15.59 pA) (Figure 2C,D), the  $I_{BG}$  in OHCs overexpressing *Tmc1\_WT*  
 117 was increased nearly 2.5 fold (42.53 pA) (Figure 2C,D). These data indicated that hair cells possess a  
 118 background leak conductance, conferred specifically by TMC1.

119 **Figure 2. TMC1 but not**  
 120 **TMC2 conducts the**  
 121 **background current**

122 (A) Exogenous expression of  
 123 TMC1 in wild-type OHCs from  
 124 organotypic P3 cochlear tissue  
 125 cultured for 1 day *in vitro* (P3 +  
 126 1DIV). EGFP was co-expressed as  
 127 an indicator. The OHCs were  
 128 stained to show spatial  
 129 distribution of TMC1  
 130 (recognized by HA antibody,  
 131 red), EGFP (by antibody,  
 132 green), and actin enriched  
 133 stereocilia (by Phalloidin,  
 134 magenta), with two OHCs in  
 135 white dashed frame shown in  
 136 details. (B) Diagram of the  
 137 recording configuration. The  
 138 OHCs were expressing  
 139 engineered TMC1 with EGFP  
 140 and whole-cell patch-clamped

141 with  $Cs^+$  in the recording electrode and  $Na^+$  extracellularly. (C) Examples of  $I_m$  of wild-type OHCs at P3 + 1DIV, expressing  
 142 control (EGFP), deafness TMC1 (*TMC1\_dn*), or wild-type TMC1 (*TMC1\_WT*). (D) Statistical data of  $I_{BG}$  from wild-type  
 143 OHCs expressing EGFP, *TMC1\_dn*, and *TMC1\_WT* under conditions similar to those in (C).  $I_{BG}$  values: EGFP,  $-17.56 \pm 3.15$   
 144 pA; *TMC1\_dn*,  $-15.59 \pm 2.79$  pA; *TMC1\_WT*,  $-42.53 \pm 6.96$  pA. (E) Representative traces of  $I_{BG}$  in cultured OHCs (P6 + 1  
 145 DIV) from *Tmc2-* and *Lhfp15*-knockout mice. (F) Statistics of  $I_{BG}$  of OHCs from P2, P4, and P6 *Tmc2-* and *Lhfp15*-knockout  
 146 mice. Recordings were made under conditions similar to those in (E).  $I_{BG}$  values: P1 wild-type,  $-0.93 \pm 0.40$  pA, P1 *Tmc2-*  
 147 knockout,  $-0.006 \pm 0.119$  pA; P3 wild-type,  $-18.85 \pm 3.53$  pA, P3 *Tmc2*-knockout,  $-26.45 \pm 3.84$  pA; P6 wild-type,  $-65.94 \pm$   
 148  $4.74$  pA, P6-knockout,  $-73.31 \pm 7.17$  pA, P6 *Lhfp15*-knockout,  $-13.64 \pm 1.96$  pA. The external solution contained 1.3 mM  $Ca^{2+}$ .  
 149 The holding potential was  $-70$  mV. Data are presented as mean  $\pm$  SEM. \* $p < 0.05$ , \*\* $p < 0.01$ , \*\*\* $p < 0.001$ , Student's t-test.

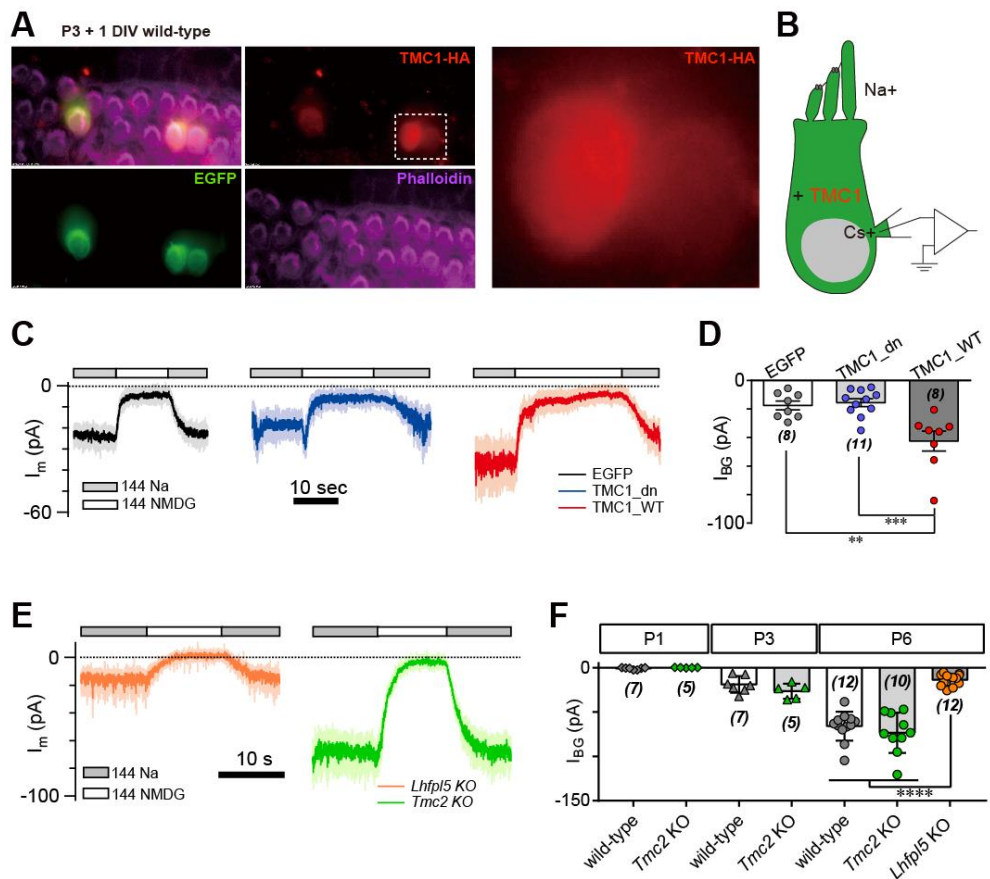



150

151 It has been suggested that TMC2 is closely coupled with TMC1 in MET function. *Tmc2* expression in  
152 the cochlea is highest between P1 and P3, then falls from P4 (Kawashima et al., 2011). Exogenously  
153 expressed TMC2 was significantly located in hair bundle of OHCs, as shown by HA tag (Figure S1). We  
154 further examined the extent to which TMC2 could confer a background current. Our data showed that the  
155  $I_{BG}$  was not altered in *Tmc2*-knockout OHCs at P1, P3, and P6 compared to controls (Figure 2E,F).  
156 Similarly, overexpression of TMC2 did not noticeably change the  $I_m$  baseline (data not shown). In parallel,  
157 we analyzed the  $I_{BG}$  in *Lhfpl5*-knockout OHCs. Interestingly, similar to *Tmc1*-knockout, there was no  
158 evident  $I_{BG}$  in *Lhfpl5*-knockout OHCs (Figure 2E,F), consistent with the previous findings that LHFPL5  
159 function in a common pathway (Beurg et al., 2015b; Xiong et al., 2012).

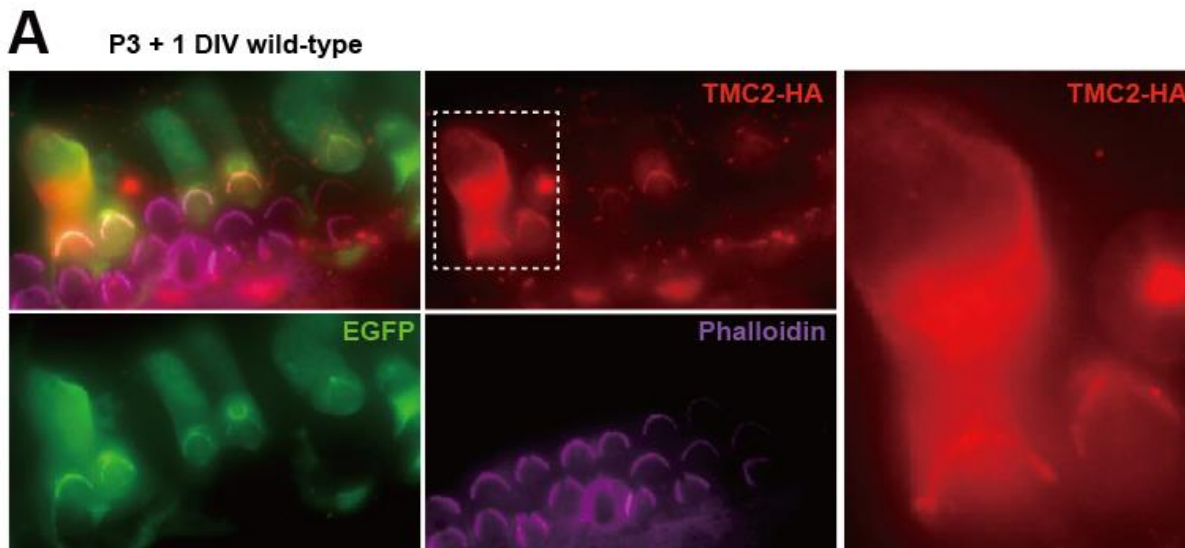

160 **Figure S1. Localization of ectopically expressed TMC2 in OHCs, related to Figure 2**

161 (A) Exogenous expression of TMC2 in P3 + 1DIV OHCs. The OHCs were stained by antibodies to show spatial pattern of  
162 TMC2 (by HA antibody, red) and EGFP (by antibody, green). The hair bundle was stained by Phalloidin (magenta). Right: two  
163 transfected OHCs were shown enlarged from the white dashed frame.

164

165 **TMC1-mediated leak current is not carried by the resting open MET channel**



166 Due to existing tension of the hair bundle, there is a sustained open probability of MET channels in hair  
167 cells at rest (Assad and Corey, 1992; Corey and Hudspeth, 1983; Johnson et al., 2012). The background  
168 current may be composed of the leak current and the resting MET current. To determine the relationship  
169 between those current, we therefore analyzed the leak current during mechanical stimulation of hair  
170 bundles and in the presence of MET channel blockers (Figure 3A). Since conductance through the MET  
171 channel is enhanced when the external  $\text{Ca}^{2+}$  concentration is low, we carried out the experiments in 0.3  
172 mM  $\text{Ca}^{2+}$  to increase the sensitivity. At rest, the  $I_m$  was 97.5 pA (Figure 3A). A sinusoidal mechanical  
173 stimulation delivered by a fluid jet deflected hair bundles back and forth to open and close MET channels  
174 (Figure 3A, inset). We recorded typical MET current at open status, while the  $I_m$  at closed status was  
175 around 45 pA (Figure 3B, #1, left), similar to the  $I_m$  as OHCs treated with dihydrostreptomycin (DHS)  
176 (Figure 3B, #2, middle). When switching 144  $\text{Na}^+$  + 100  $\mu\text{M}$  DHS to 144 mM  $\text{NMDG}^+$  solution, the  
177 current baseline was near zero (Figure 3B, #3, right), which was considered as  $I_{\text{Leak}}$  likely mediated by  
178 TMC1. Thus, neither mechanical nor pharmacological blockade of the MET channel affect  $I_{\text{Leak}}$  (Figure  
179 3C). We further examined the proportion of  $I_{\text{Leak}}$  in  $I_{\text{BG}}$  in different  $\text{Ca}^{2+}$  concentration, which became a  
180 major part when  $[\text{Ca}^{2+}]_o$  was 1.3 mM and larger (Figure 3D). In the following experiments, we presented  
181 most of data as  $I_{\text{Leak}}$  in 1.3 mM  $[\text{Ca}^{2+}]_o$  by subtraction current with or without 100  $\mu\text{M}$  DHS.

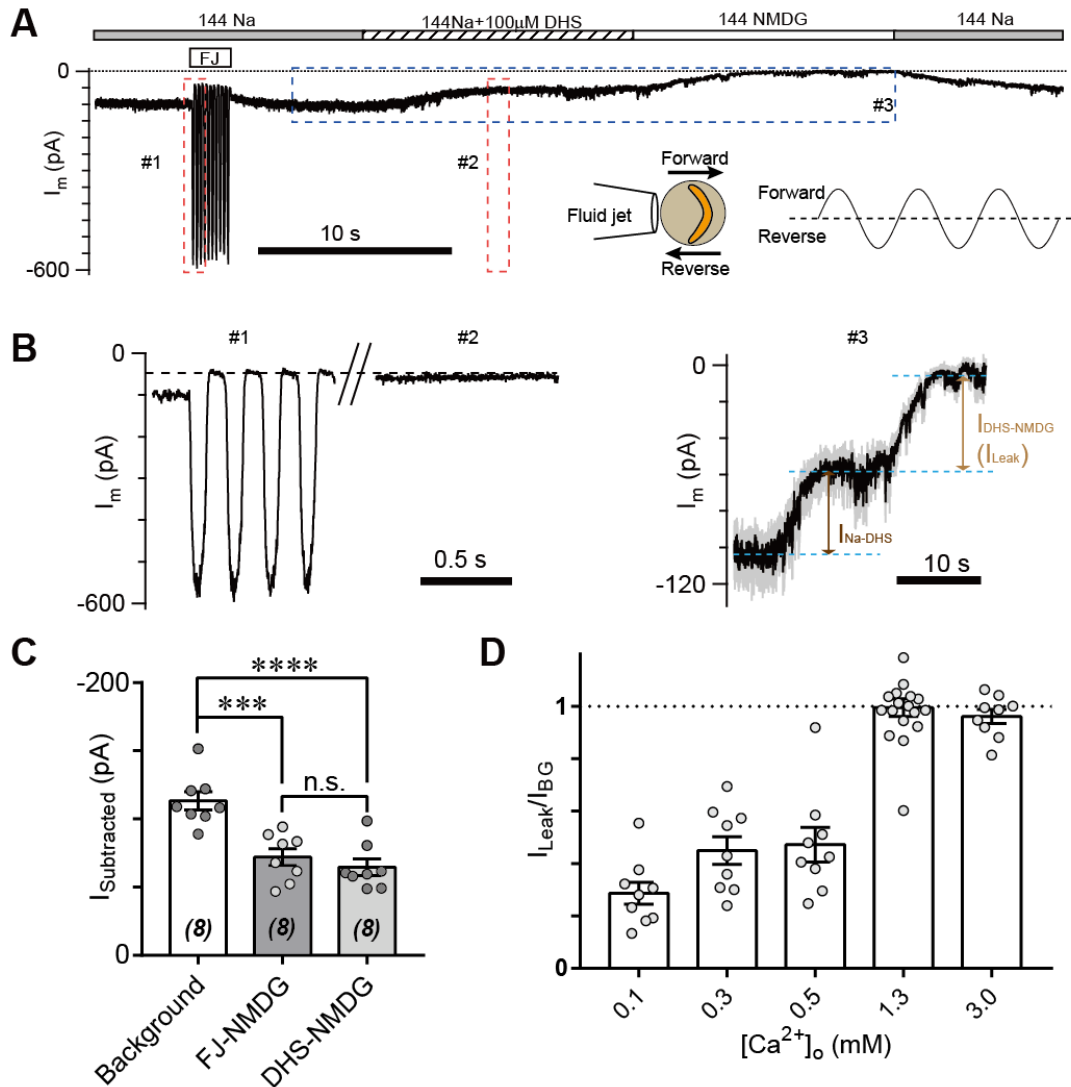

182

183 **Figure 3. TMC1-mediated leak current is not carried by the resting open MET channel**

184 (A) Representative  $I_m$  trace showing fluid jet (FJ)-induced open and closed status of MET current and DHS-induced alteration  
 185 of baseline current. The OHCs were bathed in external solution with 0.3 mM  $Ca^{2+}$  instead of 1.3 mM  $Ca^{2+}$ . Insets: left, a diagram  
 186 of fluid jet stimulation on a hair bundle; right, a 40 Hz sinusoidal stimulation protocol was used to induce forward and reverse  
 187 deflection of the hair bundle. (B) Dashed frames #1, #2, and #3 in (A) were shown as enlarged traces. The baseline current was  
 188 similar when the MET channels were closed by either FJ (#1) or DHS (#2), as highlighted with a dashed line. As shown in #3,  
 189 the DHS-sensitive resting MET current ( $I_{Na-DHS}$ ) was calculated by subtraction of  $I_m$  in 144 Na and 144 Na + 100  $\mu$ M DHS.  
 190 The baseline current was further closed by NMDG, defined as  $I_{Leak}$  by subtraction of  $I_m$  in 144 Na + 100  $\mu$ M DHS and 144  
 191 NMDG. (C) Statistics of subtracted currents under different conditions: Background,  $-113.3 \pm 6.6$  pA; FJ-NMDG ( $I_{Leak}$   
 192 subtracted from current baseline closed at negative FJ),  $-72.08 \pm 6.18$  pA; DHS-NMDG ( $I_{Leak}$  subtracted from that closed by  
 193 100  $\mu$ M DHS),  $-64.63 \pm 5.96$  pA. (D) Statistics of ratio of  $I_{Leak}$  to  $I_{BG}$  ( $I_{Leak}/I_{BG}$ ) under different  $[Ca^{2+}]_o$  conditions: 0.1 mM,  
 194  $0.29 \pm 0.04$ ; 0.3 mM,  $0.45 \pm 0.05$ ; 0.5 mM,  $0.47 \pm 0.07$ ; 1.3 mM,  $1.00 \pm 0.03$ ; 3.0 mM,  $0.96 \pm 0.03$ . The external solution  
 195 contained variable  $Ca^{2+}$  concentration as indicated. The holding potential was -70 mV. Data are represented as mean  $\pm$  SEM.  
 196 \* $p < 0.05$ , \*\* $p < 0.01$ , \*\*\* $p < 0.001$ , Student's t-test.

197

198 **Amino-acid substitutions in TMC1 alter the TMC1-mediated leak current**

199 We next addressed whether TMC1 itself carries the leak current or is associated with another channel that  
200 carries the current. It has been reported that six amino-acids in TMC1 are critical for MET channel function  
201 by affecting the pore properties of the channel (Pan et al., 2018) (Figure 4A). We replaced these six amino-  
202 acids with cysteine, as reported by Pan et al. (2018), and expressed the mutations in *Tmc1*-knockout OHCs  
203 by injectoporation to assess the effects on the leak current (Figure 4B). As controls, we used TMC1\_WT  
204 and TMC1\_dn, and found that the  $I_{Leak}$  in *Tmc1*-knockout OHCs at P3+1DIV was restored by TMC1\_WT  
205 but not by TMC1\_dn (Figure 4C,D). Among the cysteine-substituted TMC1 constructs, 5 out of the 6  
206 amino-acids failed to restore the leak current. Especially the G411C, N447C, D528C, and D569C  
207 mutations nearly abolished  $I_{Leak}$ , while T532C partially restored it. Surprisingly, M412C, which has been  
208 linked to deafness in *Beethoven* mice (Vreugde et al., 2002), behaved like wild-type TMC1.

209

210

211

212

213

214

215

216

217

218 **Figure 4. Amino-acid substitution in**  
 219 **TMC1 alters the leak current**

220 (A) TMC1 with 10 putative transmembrane  
 221 domains. The 6 substituted amino-acids are  
 222 highlighted as colored balls in the predicted  
 223 positions, and the deafness truncation is at  
 224 the third extracellular loop between TM5  
 225 and TM6. (B) Diagram of the analysis of  
 226 leak current in cultured *Tmc1*-knockout  
 227 OHCs (P3 + 1 DIV) expressing modified  
 228 TMC1 (TMC1\*). (C) Representative traces  
 229 showing the rescue of leak conductance in  
 230 OHCs by control full-length TMC1 (FL),  
 231 deafness TMC1 (dn), TMC1-G411C  
 232 (G411C), TMC1-M412C (M412C), TMC1-  
 233 N447C (N447C), TMC1-D528C (D528C),  
 234 TMC1-T532C (T532C), and TMC1-D569C  
 235 (D569C). Perfusion contents are indicated  
 236 below. An 800 nm step deflection was  
 237 applied to the hair bundle by a glass probe.  
 238 The glass probe induced MET currents are  
 239 marked “+”, accompanying artefacts  
 240 induced by switching the perfusion system.  
 241 Note the MET current was truncated for  
 242 better showing the leak current. (D)  
 243 Statistics of rescue by mTMC1 constructs.  
 244  $I_{Leak}$  values: FL,  $-48.66 \pm 4.76$  pA, G411C,  
 245  $-22.69 \pm 3.37$  pA; M412C,  $-40.6 \pm 6.4$  pA,  
 246 N447C,  $-15.24 \pm 1.42$  pA; D528C,  $-21.66$   
 247  $\pm 3.78$  pA, T532C,  $-31.73 \pm 4.32$  pA,  
 248 D569C,  $-22.51 \pm 3.43$  pA, dn,  $-18.05 \pm 3.25$   
 249 pA. The rescue indexes of FL and dn were  
 250 used to evaluate significant difference. Cell  
 251 numbers were shown on each bar. The  
 252 external solution contained 1.3 mM  $Ca^{2+}$ .  
 253 The holding potential was -70 mV. Data are  
 254 presented as mean  $\pm$  SEM. \* $p < 0.05$ , \*\* $p$   
 255  $< 0.01$ , \*\*\* $p < 0.001$ , Student's t-test.

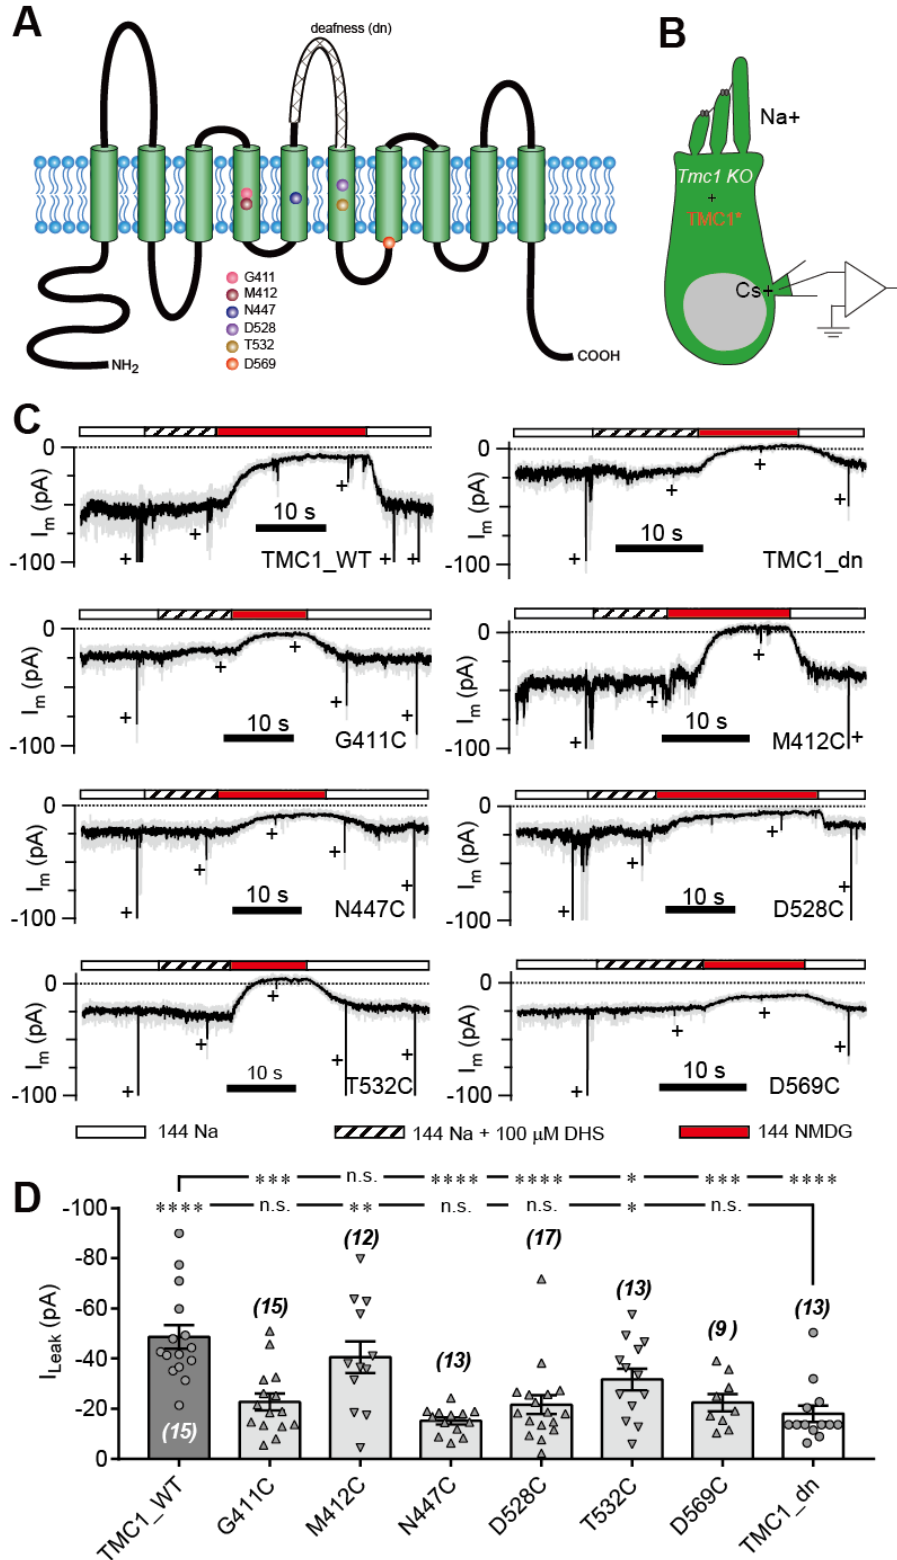

256

257 Treatment with MTSET (2-(trimethylammonium)ethyl methanethiosulfonate, bromide) did not change

258 the current baseline in OHCs expressing any of the six cysteine-substituted TMC1 constructs (Figure S2A).  
 259 This was not because of the insensitivity of cysteine or a weak MTSET effect, since MTSET treatment  
 260 did change the MET current amplitude in *Tmc1;Tmc2* double-knockout OHCs expressing M412C (Figure  
 261 S2B) as previously reported (Pan et al., 2018). The cysteine replacement did not show a consistent pattern  
 262 of modulation of the leak current and the MET current as summarized in Fig. S2C, implying different  
 263 molecular mechanisms underlying the two types of current.

264

265 **Figure S2. Cysteine substitution in TMC1 affects**  
 266 **the MET current and the leak current, related to**  
 267 **Figure 4**

268 (A) Plots of amplitude of the background current  
 269 recorded from *Tmc1*-knockout OHCs expressing  
 270 engineered TMCs as indicated, before and after  
 271 MESET treatment. (B) Representative trace of  $I_m$   
 272 recording in a *Tmc1;Tmc2* double-knockout OHC  
 273 expressing TMC1-M412C. A train of 800 nm step  
 274 deflection was applied to the hair bundle by a glass  
 275 probe. (B) Summary of absolute values and  
 276 normalized ratios of  $I_{Leak}$  and  $I_{MET}$ . The restored  
 277 MET values of all TMC1 constructs were measured  
 278 from Pan et al., 2018, excepting that for dn, which  
 279 was from Kawashima et al., 2011.

280

281

282

283

284 **Pharmacological blockade of the TMC1-mediated leak conductance**

285 Next, we set out to evaluate the properties of the leak current by further analyzing its response to

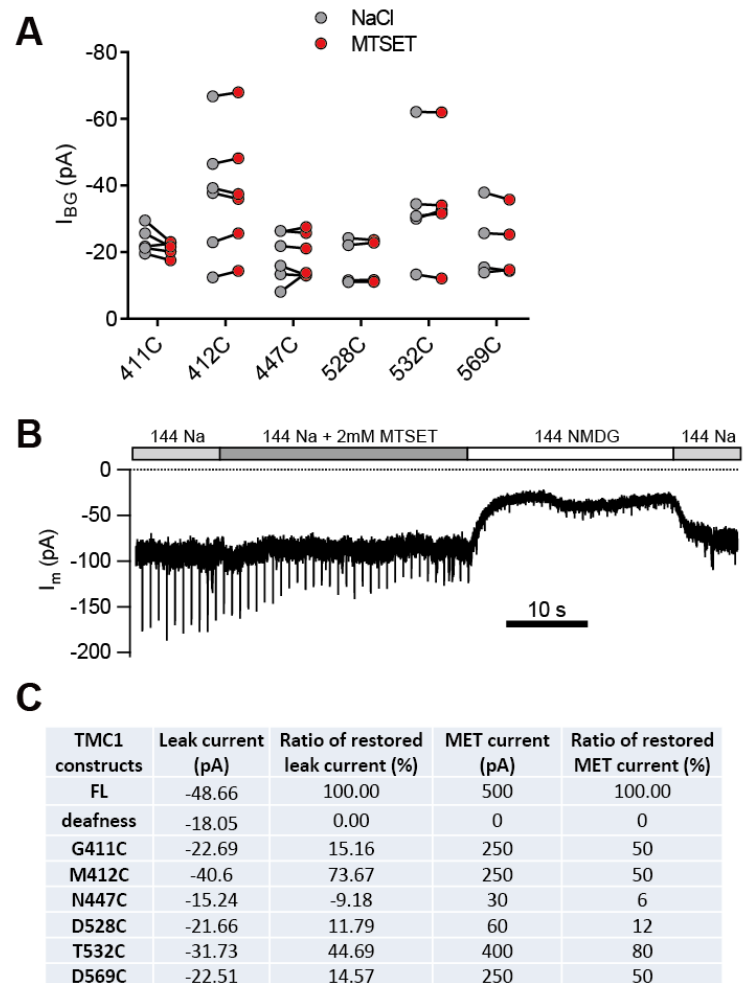

286 pharmacological inhibitors of the MET channel. We first examined the inhibitory effects of the commonly-  
287 used MET channel blockers DHS, d-tubocurarine (dTC), and amiloride (Figure 5A-D). DHS had no  
288 blocking effect on the background current baseline at a working concentration (100  $\mu\text{M}$ ) that blocks MET  
289 channels (Figure 5A,B). However, the background leak conductance was 50% inhibited at 487  $\mu\text{M}$  DHS  
290 from the fit, 30-times the  $\text{IC}_{50}$  of the MET channel (Figure 5A,B). dTC and amiloride also affected the  
291 leak current, albeit at higher concentrations than the MET current (Figure 5C,D).

292 It has been reported that trivalent cations, such as  $\text{Gd}^{3+}$  and  $\text{La}^{3+}$ , block MET channels (Farris et al.,  
293 2004; Kimitsuki et al., 1996), so we applied  $\text{Gd}^{3+}$  and  $\text{La}^{3+}$  at various concentrations and monitored the  
294 inhibitory effects on evoked MET current and leak current (Figure 5E-H). Surprisingly, the leak current  
295 was not affected even when  $[\text{Gd}^{3+}]_o$  reached 80  $\mu\text{M}$ , the  $\text{IC}_{50}$  for blocking the MET current (Figure 5E,F).  
296 However, the leak current was inhibited by  $[\text{Gd}^{3+}]_o$  with an  $\text{IC}_{50}$  of 541  $\mu\text{M}$  (Figure 5E,F). Similarly,  
297  $[\text{La}^{3+}]_o$  inhibited the MET channel with an  $\text{IC}_{50}$  of 259  $\mu\text{M}$  and the leak current with an  $\text{IC}_{50}$  of 531  $\mu\text{M}$   
298 (Figure 5G,H). Note  $I_{\text{BG}}$  was shown in Figure 5 but it mostly represented the TMC1 mediated leak  
299 component indeed.

300 **Figure 5. TMC1-**  
 301 **mediated leak**  
 302 **conductance is**  
 303 **antagonized by MET**  
 304 **channel blockers**

305 (A and B)  
 306 Representative trace

307 (A) and statistical  
 308 curve (B) of  $I_m$   
 309 inhibition by DHS. A  
 310 train of 800 nm step  
 311 deflection was applied  
 312 to the hair bundle by a  
 313 glass probe to induce  
 314 MET currents.  $I_{MET}$   
 315 and  $I_{BG}$  were

316 calculated and plotted  
 317 against the DHS  
 318 concentration. As  
 319 fitted by, the  $IC_{50}$  of  
 320 DHS was 15  $\mu$ M for  
 321 the MET channels and  
 322 487  $\mu$ M for the leak

323 conductance (cell  
 324 numbers, 7–11). Hill  
 325 slope:  $I_{MET}$ , -1.10;  $I_{BG}$ ,  
 326 -0.65. (C and D)  
 327 Statistical dose curve  
 328 of  $I_m$  with graded  
 329 concentrations of d-  
 330 tubocurarine (dTC)

331 (C) and amiloride (D). dTC  $IC_{50}$ :  $I_{MET}$ , 6  $\mu$ M;  $I_{BG}$ , 82  $\mu$ M. dTC Hill slope:  $I_{MET}$ , -0.47;  $I_{BG}$ , -2.80. dTC cell numbers, 5–15. Amiloride  $IC_{50}$ :  $I_{MET}$ , 46  $\mu$ M;  $I_{BG}$ , 365  $\mu$ M. Amiloride Hill slope:  $I_{MET}$ , -1.36;  $I_{BG}$ , -1.67. Amiloride cell numbers, 7–16. (E and F) Dosage effect of  $Gd^{3+}$ . Example trace (E) and statistical curve (F) of  $I_m$  in OHCs during perfusion with solutions containing graded concentrations of  $Gd^{3+}$ . A train of 800 nm step deflection was applied to the hair bundle by a glass probe to induce MET currents. The MET and leak current amplitudes changed due to the channel sensitivity of  $Gd^{3+}$  and NMDG.  $IC_{50}$ :  $I_{MET}$ , 66  $\mu$ M;  $I_{BG}$ , 524  $\mu$ M. Hill slope:  $I_{MET}$ , -0.48;  $I_{BG}$ , -2.49. Cell numbers, 7–16. (G and H) Dose effect of  $La^{3+}$ . Example trace (G) and dosage curve (H) of  $I_m$  with  $La^{3+}$  treatment. A train of 800 nm step deflection was applied to the hair bundle by a glass probe to induce MET currents.  $IC_{50}$ :  $I_{MET}$ , 259  $\mu$ M;  $I_{BG}$ , 531  $\mu$ M. Hill slope:  $I_{MET}$ , -1.06;  $I_{BG}$ , -5.67. Cell numbers, 7–8. For space reason, 144 NMDG was shown as 0 Na. The external solution contained 1.3 mM  $Ca^{2+}$ . The holding potential was -70 mV. Data are presented as mean  $\pm$  SEM. \* $p$  < 0.05, \*\* $p$  < 0.01, \*\*\* $p$  < 0.001, Student's t-test.

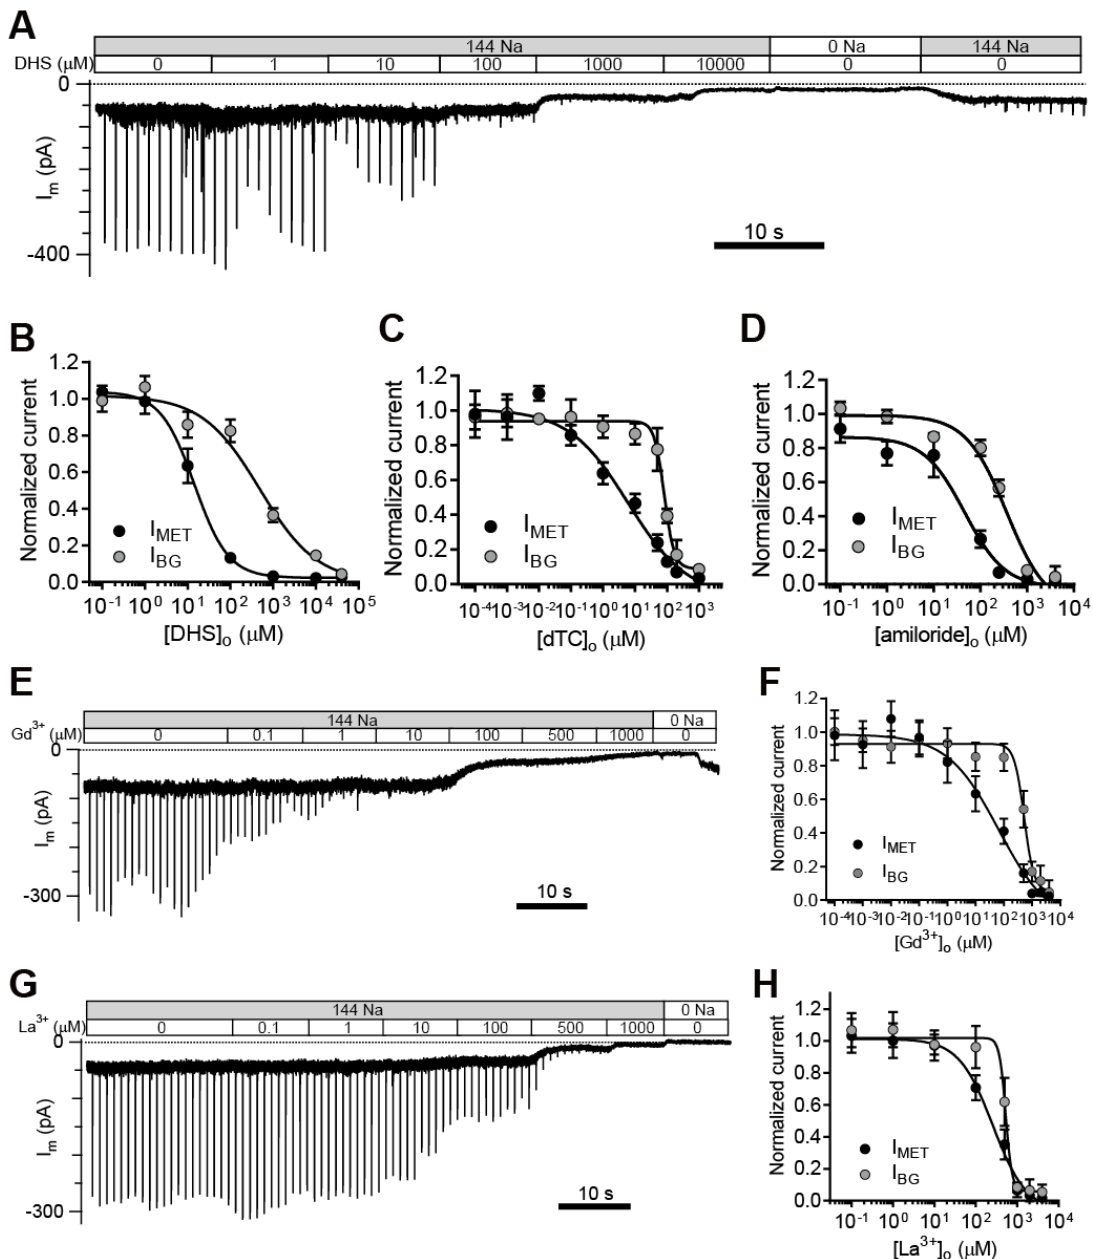



341

### 342 **Ionic permeability of the TMC1-mediated leak conductance**

343 To further characterize the leak current in OHCs, we carried out a series of ion-permeation tests using the  
344 cations  $\text{Li}^+$ ,  $\text{Cs}^+$ ,  $\text{Ba}^{2+}$ ,  $\text{Zn}^{2+}$ ,  $\text{Co}^{2+}$ ,  $\text{Mg}^{2+}$ , and  $\text{Ca}^{2+}$  (Figure 6A,B). Most of the cations shared a size of  $I_{\text{Leak}}$   
345 similar to  $\text{Na}^+$ , except for  $\text{Cs}^+$  and  $\text{Ca}^{2+}$  (Figure 6A,B). The  $\text{Cs}^+$ -conducted  $I_{\text{Leak}}$  was slightly larger (Figure  
346 2A), while 75 mM  $\text{Ca}^{2+}$  robustly blocked the  $I_{\text{Leak}}$  (Figure 6B). The  $\text{Ca}^{2+}$  permeability of the leak channel  
347 was further determined from calculation of reversal potentials by a voltage ramp stimulation with  $\text{Ca}^{2+}$   
348 extracellularly and  $\text{Cs}^+$  intracellularly (Figure 6C). The  $\text{Ca}^{2+}$  permeability was extremely small comparing  
349 to  $\text{Na}^+$  and  $\text{Mg}^{2+}$  permeability (Figure 6D). Next, we monitored the background and MET currents in  
350 solutions containing different concentrations of  $\text{Ca}^{2+}$  and  $\text{Na}^+$ . Significantly, the background current was  
351 highly sensitive to  $\text{Ca}^{2+}$ ; it increased when  $[\text{Ca}^{2+}]_o$  declined and decreased when  $[\text{Ca}^{2+}]_o$  increased, while  
352 the MET current was reduced at first and then reached a plateau after  $[\text{Ca}^{2+}]_o$  was  $>10$  mM (Fig. 6E,F)  
353 that was sufficient to block the membrane current to an extent similar to TMC1 removal in OHCs (Fig.  
354 6G).

355 **Figure 6. High-concentration**  
 356 **Ca<sup>2+</sup> blocks the leak current**  
 357 **but not MET current**

358 (A) Monovalent cations Li<sup>+</sup> and  
 359 Cs<sup>+</sup> conducted the leak current.  
 360 In this experiment, 150 mM  
 361 NaCl was substituted with 150  
 362 mM LiCl or 150 mM CsCl in  
 363 the external solution. (B)  
 364 Divalent cations 10 mM Ba<sup>2+</sup>,  
 365 75 mM Zn<sup>2+</sup>, 75 mM Co<sup>2+</sup>,  
 366 150 mM Mg<sup>2+</sup>, and 75 mM Ca<sup>2+</sup>,  
 367 conducted the leak current. The  
 368 150 mM NaCl was partially or  
 369 completely replaced with the  
 370 according cations as described  
 371 in the Methods. (C)  
 372 Representative I<sub>m</sub> traces by  
 373 ramp stimulation for calculation  
 374 of ionic permeability.  
 375 Extracellular ion was switched  
 376 from 150 mM Na<sup>+</sup> to 75 mM  
 377 Ca<sup>2+</sup> + 75 mM NMDG<sup>+</sup>, and to  
 378 150 NMDG<sup>+</sup>. In the  
 379 intracellular solution, 150 mM  
 380 CsCl was used. (D) Statistics of  
 381 ionic permeability calculated  
 382 from similar recordings in (C).  
 383 (E) Example trace of I<sub>m</sub> of  
 384 OHCs during perfusion with  
 385 solutions containing graded  
 386 concentrations of Ca<sup>2+</sup> and Na<sup>+</sup>. An 800 nm step deflection was applied to the hair bundle by a glass probe. The glass probe induced MET currents are marked “+”, accompanying artefacts induced by switching the perfusion system. (F) Dose curves of I<sub>BG</sub> and I<sub>MET</sub> in wild-type OHCs in different Ca<sup>2+</sup> and Na<sup>+</sup> concentrations (cell numbers, 9–20). (G) Statistical analysis of dose-dependent background leak current in OHCs from wild-type (black) and *Tmc1*-knockout (red) mice when bathed in mixed Ca<sup>2+</sup> and Na<sup>+</sup>. The ions and concentrations used in test external solutions were variable, as described in this figure legend and the methods. The holding potential was -70 mV. Data are presented as mean ± SEM. \*p < 0.05, \*\*p < 0.01, \*\*\*p < 0.001, Student’s t-test.

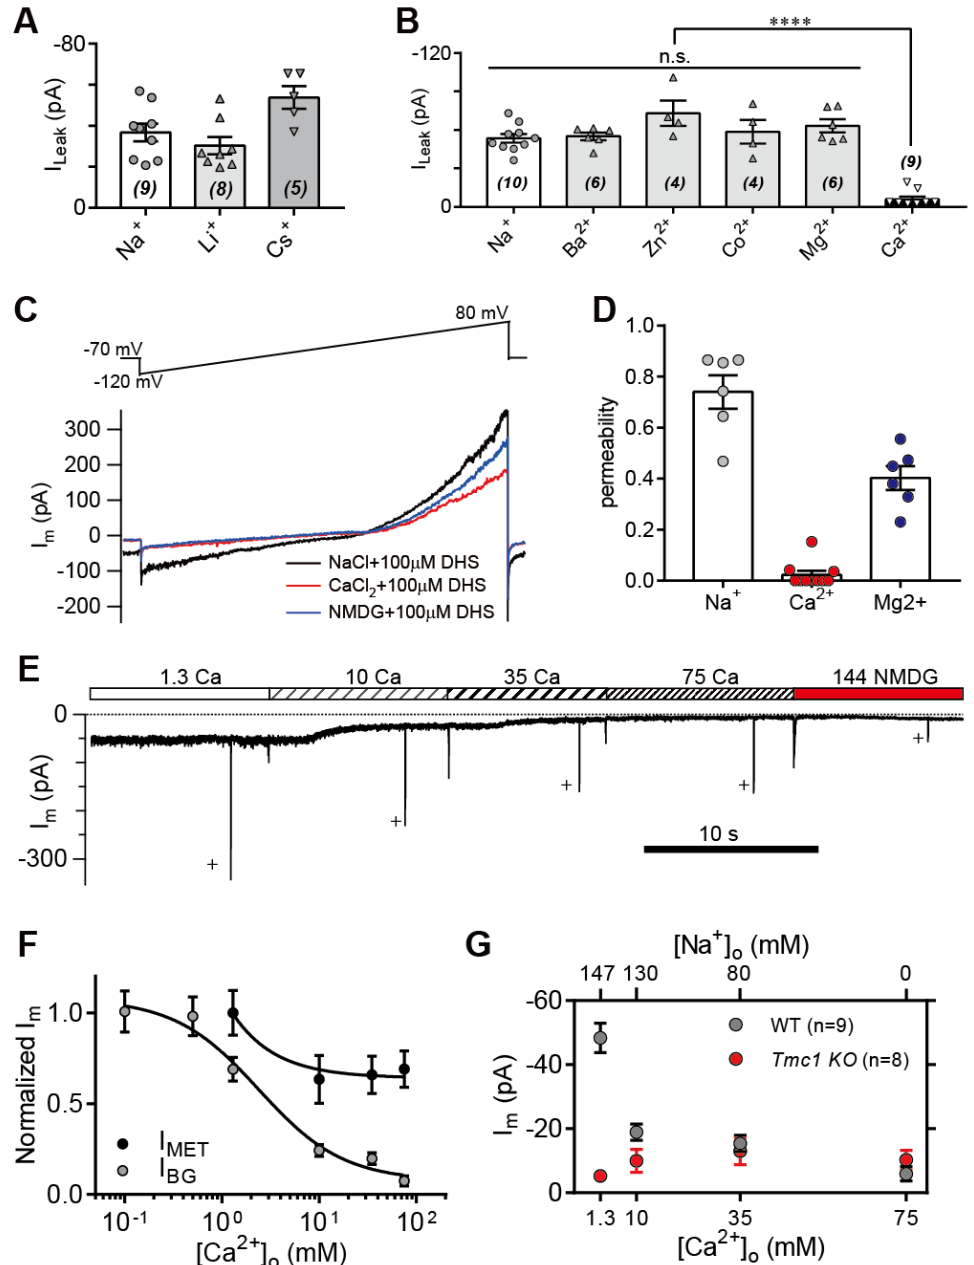

393

394 **The leak current modulates action potential firing in IHCs**

395 We next tackled the physiological relevance of the TMC1-mediated background conductance in auditory  
396 transduction. A significant leak conductance would be expected to depolarize the membrane potential and  
397 affect cell excitability. IHCs are innervated by the spiral ganglion neurons that transmit sound information  
398 to the CNS and signal transmission from hair cells to the spiral ganglion might therefore be affected by  
399 the leak conductance. We therefore measured the membrane potential ( $V_m$ ) in IHCs (Figure 7A). In wild-  
400 type IHCs, the  $V_m$  varied actively and periodically in the bursting and non-bursting states (Figure 7A).  
401 However, the  $V_m$  was largely hyperpolarized and there was almost no action potential firing in *Tmc1*-  
402 knockout IHCs (Figure 7A). With positive current injection, the *Tmc1*-knockout IHCs fired action  
403 potentials at threshold similar to wild-type IHCs (Figure 7A). Although the  $V_m$  in the non-bursting state  
404 was more hyperpolarized than in the bursting state in wild-type IHCs, it was positive to the  $V_m$  in *Tmc1*-  
405 knockout IHCs (Figure 7A,B). This change of membrane excitability was also defined by monitoring the  
406 action potential bursting rate (Figure 7C) and the leak current (Figure 7D). The leak current was smaller  
407 in IHCs than that in OHCs, which may be due to different expression profile of potassium channels  
408 (Marcotti et al., 2006; Marcotti et al., 2003). With ramp current injection, the firing threshold was similar,  
409 but the minimum injected current required to induce firing in *Tmc1*-knockout IHCs was  $\sim 20$  pA greater  
410 than that in wild-type IHCs (Figure 7E,G,H). When depolarized by stepped current injection, the firing  
411 rate was lower in *Tmc1*-knockout IHCs and the rate-current curve was shifted to the right but finally  
412 reached a similar level when a larger current was injected (Figure 7F,I).

413 **Figure 7. IHC excitability is**  
 414 **down-regulated in *Tmc1*-**  
 415 **knockout mice**

416 (A) Representative current-clamp  
 417 recording in IHCs from wild-type  
 418 (black) and *Tmc1*-knockout (red)  
 419 mice. For the most part, the IHCs  
 420 were held at 0 pA. To define the  
 421 excitability, a ramp current was  
 422 injected into the *Tmc1*-knockout  
 423 IHCs to induce a burst of spikes. (B)  
 424 Statistics of  $V_m$  recorded in IHCs  
 425 similar to (A). Values of  $V_m$  in wild-  
 426 type IHCs were defined as two  
 427 states, bursting and non-bursting,  
 428 which did not apply to *Tmc1*-  
 429 knockout IHCs.  $V_m$  of wild-type in  
 430 bursting state,  $48.78 \pm 2.15$  mV;  
 431 wild-type in non-bursting state,  
 432  $60.19 \pm 1.86$  mV; *Tmc1*-knockout,  
 433  $72.89 \pm 1.75$  mV. (C) Statistics of  
 434 firing rate (spikes/s) in IHCs similar  
 435 to (A). Values of firing rate: wild-  
 436 type,  $3.2 \pm 0.7$  Hz; *Tmc1*-knockout,  
 437  $0 \pm 0$  Hz. (D) Statistics of  $I_{Leak}$  from  
 438 voltage-clamp recording in IHCs.  
 439 Values of  $I_{Leak}$ : wild-type,  $23.93 \pm$   
 440  $3.58$  pA; *Tmc1*-knockout,  $14.1 \pm$   
 441  $1.79$  pA. (E) Representative current-  
 442 clamp traces of  $V_m$  in IHCs with  
 443 ramp-current injection from  $-100$   
 444 pA to  $+100$  pA for 3 s. (F)

445 Representative current-clamp recording in IHCs stimulated by a family of depolarization currents from  $-50$  pA to  $+125$  pA at 25 pA steps. (G) Statistics of firing threshold from data as in (E). Values of threshold were  $-47.3 \pm 1.2$  mV in wild-type OHCs and  $-47.39 \pm 0.92$  mV in *Tmc1*-knockout OHCs. (H) Statistics of minimum current injected (Injected  $I_{min}$ ) to evoke an action potential from data as in (E). In wild-type OHCs:  $-0.23 \pm 6.95$  pA; in *Tmc1*-knockout OHCs:  $-21.12 \pm 3.66$  pA. (I) Statistics of numbers of spike/s from data as in (F). wild-type: 0 pA,  $1.25 \pm 0.67$ ; 25 pA,  $9.13 \pm 0.83$ ; 50 pA,  $12.25 \pm 0.70$ ; 75 pA,  $13.125 \pm 0.67$ , 100 pA,  $13.25 \pm 0.59$ ; 125 pA,  $13.625 \pm 0.65$ . *Tmc1*-knockout: 0 pA,  $0 \pm 0$ ; 25 pA,  $5.11 \pm 1.32$ ; 50 pA,  $10.56 \pm 1.08$ ; 75 pA,  $12.67 \pm 0.71$ , 100 pA,  $13.00 \pm 0.85$ ; 125 pA,  $13.22 \pm 1.10$ . The external solution contained 1.3 mM  $Ca^{2+}$ .  $K^+$  was used in the intracellular solution for current-clamp recordings in this figure except that  $Cs^+$  was used for voltage-clamp recording in (D). Data are presented as mean  $\pm$  SEM. \* $p < 0.05$ , \*\* $p < 0.01$ , \*\*\* $p < 0.001$ , Student's t-test.

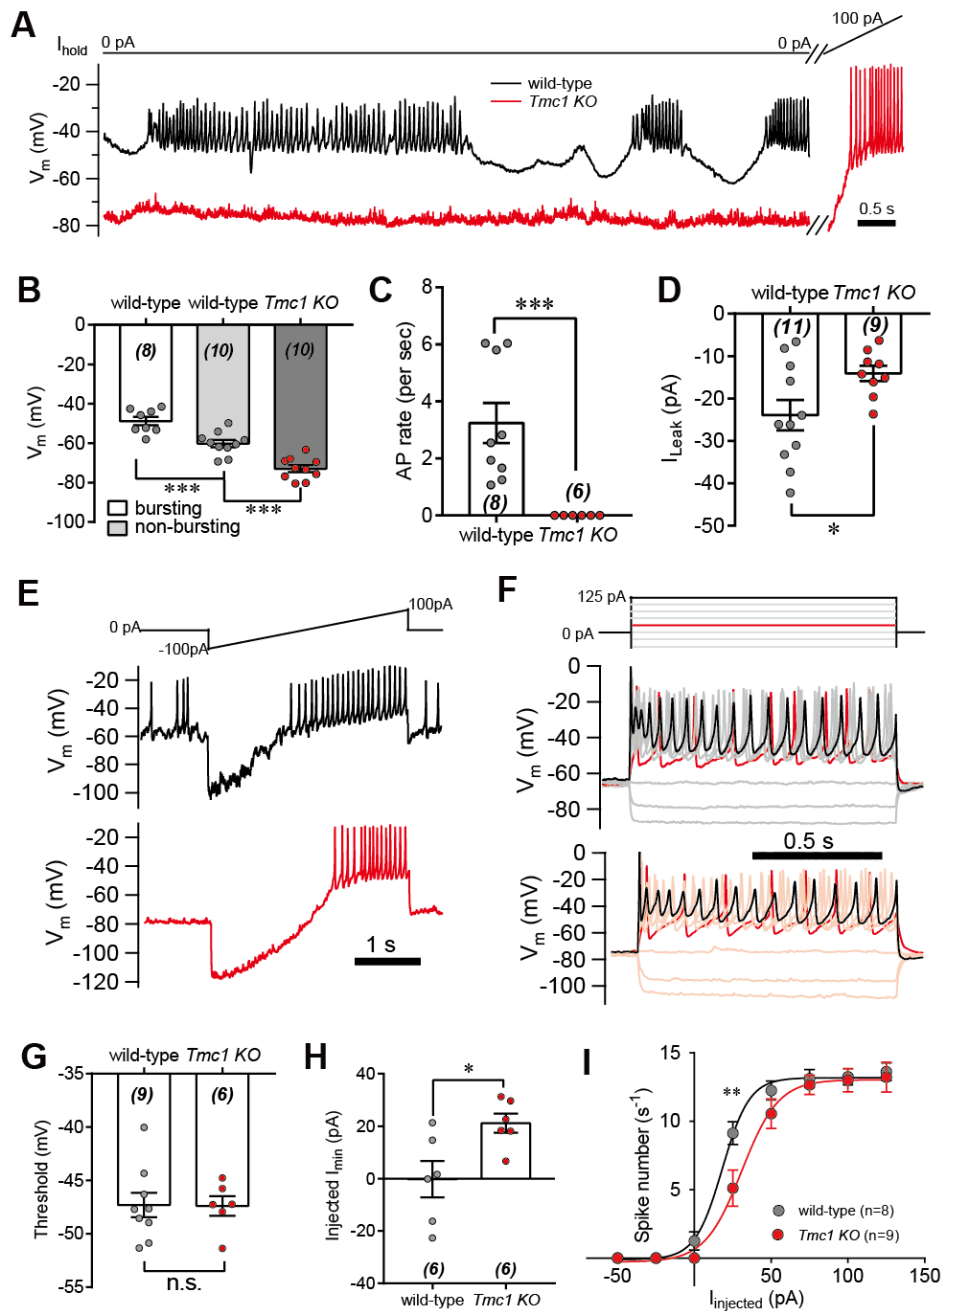

454

455 **The leak current follows the tonotopic gradient of the MET response in OHCs**

456 Next, we investigated the effect of the leak current in OHCs. First, the  $I_{\text{Leak}}$  was examined in OHCs along  
457 the cochlear coil (Figure 8A). We indeed found a gradient in the leak current in wild-type OHCs, while  
458 the gradient was abolished in *Tmc1*-knockout OHCs (Figure 8B,C). Next, we analyzed the MET current  
459 along the cochlear coil when blocking the leak current with 35 mM  $[\text{Ca}^{2+}]_o$  since 35 mM  $[\text{Ca}^{2+}]_o$  was  
460 sufficient to block the leak current to an extent similar to TMC1 removal in OHCs (Figure 6G). Strikingly,  
461 the gradual increase in MET current amplitude was severely blunted in OHCs in the presence of 35 mM  
462  $[\text{Ca}^{2+}]_o$  (Figure 8D,E). The effect was reminiscent to that previously reported (Beurg et al., 2014) and to  
463 our observation (Figure 8D,E) for hair cells lacking TMC1. The MET current decreased from apex to base  
464 in *Tmc1*-knockout OHCs, which might result from that the hair bundle got more disrupted at base coil.  
465 These data suggested that the tonotopic gradient of TMC1-mediated leak current and MET current in  
466 OHCs could be modulated by external  $\text{Ca}^{2+}$ .

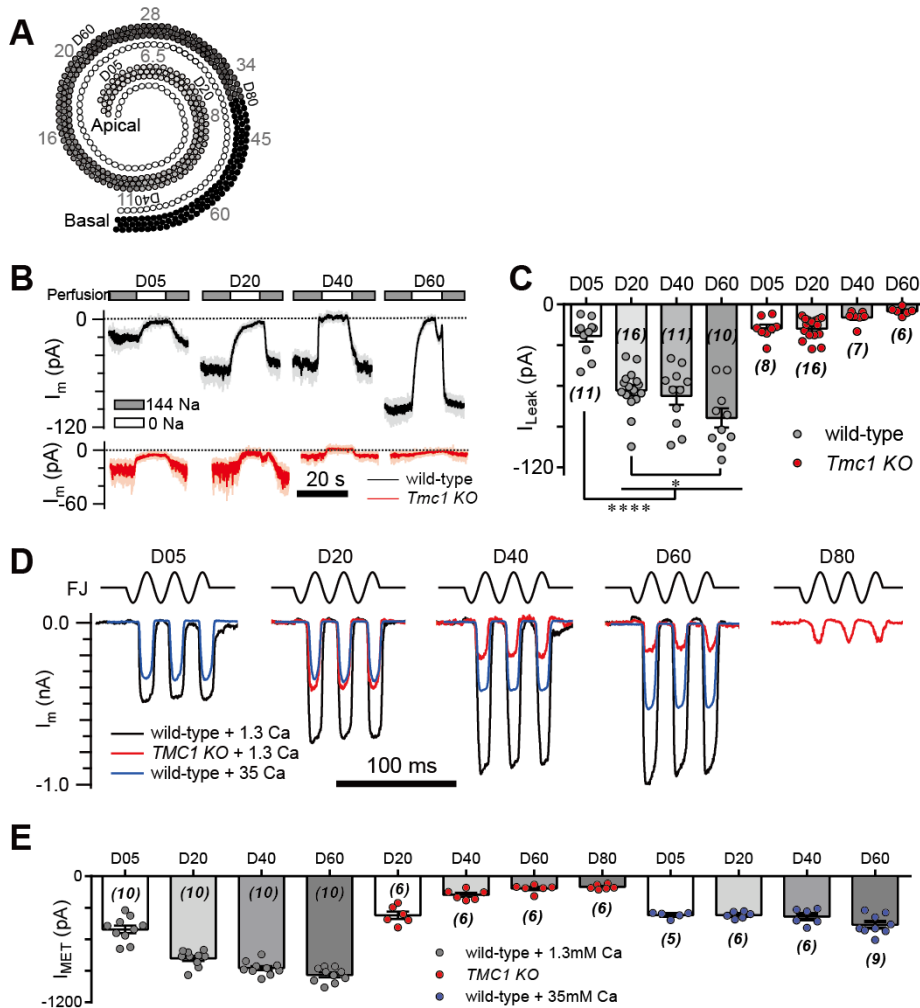

467 **Figure 8. TMC1-mediated leak and MET currents in OHCs**

468 (A) Diagram showing the tonotopic map in mouse hair cells (adapted from Figure 1B in Kim and Fettiplace, 2013), labelled  
 469 with response frequencies (kHz, grey) and location (D% to apex, black). The apex and base are defined as 0 and 1, with  
 470 reference to which D05, D20, D40, D60, and D80 represent distances of 0.05, 0.2, 0.4, 0.6, and 0.8. (B) Representative traces  
 471 of  $I_m$  recorded in OHCs at different locations along the cochlear coil, from wild-type (black) and *Tmc1*-knockout (red) mice.  
 472 The external solution contained 1.3 mM  $Ca^{2+}$ . The apex and base are defined as 0 and 1, with reference to which D05, D20,  
 473 D40, and D60 represent distances of 0.05, 0.2, 0.4, and 0.6. (C) Statistical analysis of location-specific  $I_{Leak}$  from similar  
 474 recordings as in (B). Values of  $I_{Leak}$  in wild-type OHCs (pA): D05,  $-23.3 \pm 4.1$ ; D20,  $-63.26 \pm 3.98$ ; D40,  $-67.45 \pm 6.51$ ; D60,  
 475  $-83.53 \pm 7.14$ .  $I_{Leak}$  values in *Tmc1*-knockout OHCs (pA): D05,  $-17.72 \pm 2.82$ ; D20,  $-17.84 \pm 1.98$ ; D40,  $-9.56 \pm 1.87$ ; D60,  $-$   
 476  $4.98 \pm 1.15$ . (D) Representative traces of location-specific MET current in wild-type OHCs when bathed in 1.3 mM or 35 mM  
 477  $Ca^{2+}$  and *Tmc1*-knockout OHCs when bathed in 1.3 mM  $Ca^{2+}$ . A sinusoidal deflection was applied to the hair bundle by a fluid  
 478 jet. (E) Statistical analysis of location-specific macroscopic MET current. Values of  $I_{MET}$  in wild-type OHCs in 1.3 mM  $Ca^{2+}$   
 479 (pA): D05,  $-505.1 \pm 37.2$  pA; D20,  $-780.2 \pm 23.7$  pA; D40,  $-872.3 \pm 20.5$  pA; D80,  $-938.8 \pm 21.8$  pA. Values of  $I_{MET}$  in wild-  
 480 type OHCs in 35 mM  $Ca^{2+}$  (pA): D05,  $-369 \pm 12.6$  pA; D20,  $-368.9 \pm 126$  pA; D40,  $-384.4 \pm 30.2$  pA; D60,  $-461.1 \pm 30.6$   
 481 pA. Values of  $I_{MET}$  in *Tmc1*-knockout OHCs in 1.3 mM  $Ca^{2+}$  (pA): D20,  $-371.2 \pm 34.7$  pA; D40,  $-176.8 \pm 19.1$  pA; D60,  $-$   
 482  $116.9 \pm 15.4$  pA; D80,  $-102.4 \pm 9.3$  pA. The holding potential was -70 mV. Data are presented as mean  $\pm$  SEM. \*p <0.05, \*\*p  
 483 <0.01, \*\*\*p <0.001, Student's t-test.

484 We next determined whether the change in macroscopic MET current represents a change in the unitary  
 485 MET channel conductance and whether the absence of the leak current disrupts the tonotopic gradient of  
 486 MET conductance. The unitary MET channel analysis showed that 35 mM  $[Ca^{2+}]_o$  reduced the unitary  
 487 MET channel current to  $\sim 5$  pA in both low-frequency and high-frequency OHCs (Figure 9A,B). These  
 488 data further suggested that the extracellular  $Ca^{2+}$  modulates leak conductance and MET channel properties  
 489 accordingly.

490

491 **Figure 9. High  $Ca^{2+}$  removes the MET conductance gradient as revealed by**  
 492 **unitary channel analysis**

493 (A) Location-specific single MET channel recording from wild-type OHCs in solution  
 494 with 3 mM or 35 mM  $Ca^{2+}$  at D05 or D60.

495 The traces were chosen to show nice dual-  
 496 peak fitting but did not represent normal  
 497 flickers. A 100-nm step deflection was  
 498 applied to the hair bundle by a glass probe.

499 (B) Statistical analysis of location-specific  
 500 unitary MET channel current. Values of  
 501 unitary  $I_{MET}$  in 3 mM  $Ca^{2+}$ : D05,  $-7.03 \pm 0.19$   
 502 pA; D20,  $-7.90 \pm 0.16$  pA; D60,  $-10.59 \pm$   
 503  $0.19$  pA. Values of  $I_{MET}$  in 35 mM  $Ca^{2+}$ : D05,  
 504  $-4.72 \pm 0.11$  pA; D20,  $-4.76 \pm 0.10$  pA; D60,  
 505  $-4.92 \pm 0.11$  pA. Numbers are shown as  
 506 events/cells.

507 (C) A working model of the  
 508 molecular mechanism by which TMC1 tunes  
 509 both MET and leak channels. Dashed line  
 510 between TMC1 and other proteins indicates  
 511 undefined coupling. The holding potential  
 512 was  $-70$  mV. Data are presented as mean  $\pm$   
 513 SEM. \* $p < 0.05$ , \*\* $p < 0.01$ , \*\*\* $p < 0.001$ ,  
 514 Student's t-test.

515

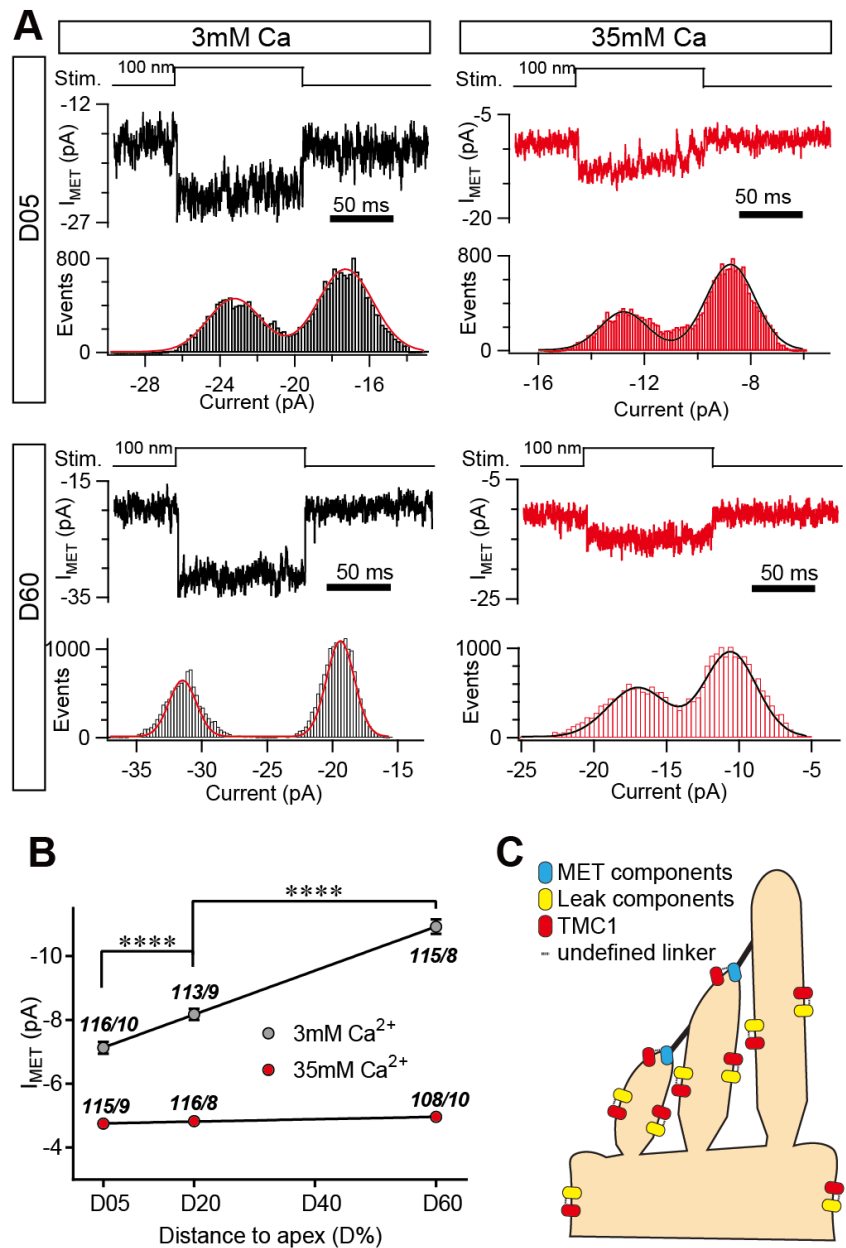



## 517 **DISCUSSION**

518 Here we uncovered, in mammalian hair cells, a previously-unappreciated role of TMC1 in mediating a  
519 background conductance and thereby regulating membrane excitability. With TMC1 deficiency, the  
520 resting membrane potential is hyperpolarized, resulting in the absence of spontaneous action potential  
521 firing in neonatal IHCs (Figure 7) and the removal of gradient of MET conductance in OHCs (Figure 8  
522 and 9) (Beurg et al., 2014; Beurg et al., 2015b). In other species, TMC orthologues function in diverse  
523 ways according to their expression pattern in effector cells (Guo et al., 2016; He et al., 2019; Wang et al.,  
524 2016; Yue et al., 2018; Zhang et al., 2015; Zhang et al., 2016). It has been recognized that leak conductance  
525 is generally used in the nervous system to regulate neuronal excitability and thus circuit activity; it recruits  
526 a variety of channels on the plasma membrane or endoplasmic reticulum (Bers, 2014; Enyedi and Czirjak,  
527 2010; Lu et al., 2007). Hence, these results strongly support the hypothesis that the excitability of cells  
528 and neural circuits that control processes from sensory transduction to motor function are commonly  
529 upregulated by TMC proteins in diverse organisms.

530 TMC1 is likely a major component of the leak conductance, as implied by the mutagenesis experiment  
531 (Figure 4). Our data showed that at least 4 amino-acids are critical for the leak conductance, since these  
532 constructs cannot restore the leak current after replacement of a single amino-acid by cysteine, implying  
533 that TMC1 is key to generating the leak conductance. However, adding positive charge to these amino-  
534 acids does not affect the leak conductance, as revealed by its insensitivity to treatment with MTSET. In  
535 addition, the leak conductance is inhibited by typical MET channel blockers, implying that TMC1 as the  
536 responsible component. It has been proposed that both TMC-1 and TMC-2 confer the leak conductance  
537 in worms (Yue et al., 2018). However, in our study of mice, only TMC1 but not TMC2 mediated the leak

538 conductance (Figure 2), indicating a unique non-MET role of TMC1 in mammals.

539 Intriguingly, the leak conductance differed from the MET conductance in several properties, although  
540 both are functional representations of TMC1. First, the leak current did not stem from the resting open  
541 MET channels (Figure 3). Second, the patterns of change differed for the leak conductance and the MET  
542 current according to the amino-acid substitution experiment (Figures 4 and S2). Third, the leak channel  
543 shared a group of identical antagonists with the MET channel but had different kinetics (Figure 5). Both  
544 MET channel blockers (Figure 5A-D) and non-selective cation channel blockers (Figure 5E-H) inhibited  
545 the leak current but with an  $IC_{50}$  5–10-fold that for the MET channel. Last, extracellular high  $Ca^{2+}$  blocked  
546 the leak conductance but not the MET channel (Figure 6). These lines of evidence indicate that TMC1  
547 confers the leak conductance by a mechanism distinct from the MET channel.

548 Interestingly, the TMC1-mediated leak conductance exhibits a tonotopic pattern in OHCs, in parallel  
549 with the tonotopicity of the MET current, which is defined by several lines of evidence. First, we found  
550 that the leak current still existed in *Tmc2*-knockout OHCs while it was absent from *Tmc1*- or *Lhfpl5*-  
551 knockout OHCs (Figure 2E,F); this is consistent with the finding that the gradient of the MET response  
552 was lost in *Tmc1*- and *Lhfpl5*-knockout mice and preserved in *Tmc2*-deficient mice (Beurg et al., 2015b).  
553 Second, the leak conductance increased along the cochlear coil (Figure 8A,B), which also coincides with  
554 the spatial *Tmc1* expression pattern (Kawashima et al., 2011) and the tonotopic gradient of TMC1 proteins  
555 in graded numbers (Beurg et al., 2018). Last, high  $Ca^{2+}$  blockade abolished both the background current  
556 and the gradient of the MET response, defined by the analysis of the macroscopic (Figure 8) and unitary  
557 MET current (Figure 9). The tonotopic gradient of conductance in OHCs is an important property of hair-  
558 cell MET (Beurg et al., 2006; Ricci et al., 2003; Waguespack et al., 2007). Our results showed that the

559 background leak conductance, together with the MET response, is tuned by extracellular  $\text{Ca}^{2+}$  and other  
560 unknown determinants, which is not surprising since other factors, such as PIP2, also regulate MET  
561 channel pore properties (Effertz et al., 2017).

562 Due to limited information about the structure of TMC1, we do not yet know how TMC1 confers the  
563 leak conductance. It has been shown that only a proportion of TMC1 proteins are localized around tip-  
564 links, and the number of TMC1 proteins increases from apex to base in OHCs as reported in a transgenic  
565 TMC1 mouse model (Beurg et al., 2018; Kurima et al., 2015), consistent with a scenario in which extra  
566 TMC1 proteins that are not in the MET complex provide the leak conductance. Based on current data, we  
567 suggest a working model (Figure 9C) in which TMC1 has dual functions by integrating into the MET  
568 channel for the mechanically-induced conductance and attaching to other undefined components for the  
569 leak conductance, in which the activity of both channels is tuned by TMC1. Interestingly, TMC1 may  
570 form dimers by sharing a protein fold similar to TMEM16A, a  $\text{Ca}^{2+}$ -activated  $\text{Cl}^-$  channels or  $\text{Ca}^{2+}$ -  
571 activated lipid scramblase (Ballesteros et al., 2018; Kunzelmann et al., 2016; Pan et al., 2018). However,  
572 this hypothesis needs to be further tested in structural and functional studies.

573

## 574 **EXPERIMENTAL PROCEDURES**

### 575 **Mouse strains and animal care**

576 The mouse strains used in this study, B6.129-TMC1<tm1.1A<sub>tg</sub>>/J, B6.129-TMC2<tm1.1A<sub>tg</sub>>/J, and  
577 B6.129-Lhfp15<tm1K<sub>jn</sub>>/K<sub>jn</sub>, were from the Jackson Laboratory (Bar Harbor, ME). The experimental  
578 procedures on mice were approved by the Institutional Animal Care and Use Committee of Tsinghua  
579 University.

580

### 581 **DNA constructs, cochlear culture, and injectoporation**

582 Mouse *Tmc1* and *Tmc2* cDNAs were cloned into CMV-Script and pCDNA3.1- vectors, respectively. To  
583 obtain the *Tmc1-deafness* vector and amino-acid-substituted *Tmc1* constructs, specific primers were  
584 designed and used for PCR (listed in Table S1). Cochlear culture and injectoporation were as previously  
585 described (Xiong et al., 2014). In this study, the organ of Corti was isolated from P3 mice and cut into 3  
586 pieces in Dulbecco's modified Eagle's medium/F12 with 1.5 µg/ml ampicillin. For electroporation, a glass  
587 pipette (2 µm tip diameter) was used to deliver cDNA plasmids (0.2 µg/µl in 1× Hanks' balanced salt  
588 solution) to hair cells in the sensory epithelium. EGFP was used as an indicator for the selection of  
589 transfected hair cells. A series of 3 pulses at 60 V lasting 15 ms at 1-s intervals was applied to cochlear  
590 tissues by an electroporator (ECM Gemini X2, BTX, CA). The cochlear tissues were cultured for 1 day *in*  
591 *vitro* and then used for electrophysiological recording.

592

| Primers       | 5'-3'                                      |
|---------------|--------------------------------------------|
| TMC1-DF-F     | tgagattaacaacaaggaattcgtgcgttcaccgttt      |
| TMC1-DF-R     | tgagacgcacgaattccttggttaatctcatccaaggc     |
| mTMC1-G411C-F | aatgtccctcctgTGTatgttctgcccaccctgtttga     |
| mTMC1-G411C-R | ACAacaggaggacattaccatgttcatttcatttttccacca |
| mTMC1-M412C-F | gtccctcctggggTGTtctgtcccaccctgtttgactt     |
| mTMC1-M412C-R | ACAccccaggaggacattaccatgttcatttcatttttccca |

|               |                                               |
|---------------|-----------------------------------------------|
| mTMC1-N447C-F | tcttcttctaggcTGTttgtatgtattcattctcgctt        |
| mTMC1-N447C-R | ACAgcctagaagaagagcaaaaatgcgccccaggag          |
| mTMC1-D528C-F | tctcaccgtttctTGTgtcctgaccacttacgtcacgat       |
| mTMC1-D528C-R | ACAagaacggtgagacgcacgaattcctgccccaccattgttc   |
| mTMC1-T532C-F | tgacgtcctgaccTGTtacgtcacgatcctcattggcga       |
| mTMC1-T532C-R | ACAagtcaggacgtcagaaacggtgagacgcacgaattc       |
| mTMC1-D569C-F | atacacagaattcTGTatcagtggcaacgtcctcgctct       |
| mTMC1-D569C-R | ACAgaattctgtgtatgaaggatatccatattctaagtcccagca |

593 Table S1. Primers used for generating desired truncation and mutations in mouse *Tmc1* cDNA.

594

## 595 **Electrophysiology**

596 Hair cells were recorded using whole-cell patch-clamp as previously described (Xiong et al., 2012). All  
597 experiments were performed at room temperature (20-25°C). Briefly, the basilar membrane with hair cells  
598 was acutely dissected from neonatal mice. The dissection solution contained (in mM): 141.7 NaCl, 5.36  
599 KCl, 0.1 CaCl<sub>2</sub>, 1 MgCl<sub>2</sub>, 0.5 MgSO<sub>4</sub>, 3.4 L-glutamine, 10 glucose, and 10 H-HEPES (pH 7.4). Then the  
600 basilar membrane was transferred into a recording chamber with recording solution containing (in mM):  
601 144 NaCl, 0.7 NaH<sub>2</sub>PO<sub>4</sub>, 5.8 KCl, 1.3 CaCl<sub>2</sub>, 0.9 MgCl<sub>2</sub>, 5.6 glucose, and 10 H-HEPES (pH 7.4). For  $I_{Leak}$   
602 calculation, the cells were further bathed in recording solution containing 144 mM NMDG that replaced  
603 144 mM NaCl. The acutely isolated or cultured basilar membrane was used for electrophysiological  
604 recording within 1 h. Hair cells were imaged under an upright microscope (BX51WI, Olympus, Tokyo,

605 Japan) with a 60× water-immersion objective and an sCMOS camera (ORCA Flash4.0, Hamamatsu,  
606 Hamamatsu City, Japan) controlled by MicroManager 1.6 software (Edelstein et al., 2010). Patch pipettes  
607 were made from borosilicate glass capillaries (BF150-117-10, Sutter Instrument Co., Novato, CA) with a  
608 pipette puller (P-2000, Sutter) and polished on a microforge (MF-830, Narishige, Tokyo, Japan) to  
609 resistances of 4-6 MΩ. Intracellular solution contained (in mM): 140 CsCl, 1 MgCl<sub>2</sub>, 0.1 EGTA, 2 Mg-  
610 ATP, 0.3 Na-GTP, and 10 H-HEPES, pH 7.2), except when CsCl was replaced with KCl in current-clamp.  
611 Hair cells were recorded with a patch-clamp amplifier (EPC 10 USB and Patchmaster software, HEKA  
612 Elektronik, Lambrecht/Pfalz, Germany). The liquid junction potential is not corrected in the data shown.  
613 As measured, the pipette with CsCl intracellular solution had a value of +4 mV in regular recording  
614 solution and -6 mV in 144 mM NMDG<sup>+</sup> solution.

615 For single-channel recordings, we followed published procedures (Ricci et al., 2003; Xiong et al., 2012).  
616 The intracellular solution was the same for macroscopic and microscopic current recording. To break tip-  
617 links, hair bundles were exposed to Ca<sup>2+</sup>-free solution using a fluid jet (in mM): 144 NaCl, 0.7 NaH<sub>2</sub>PO<sub>4</sub>,  
618 5.8 KCl, 5 EGTA, 0.9 MgCl<sub>2</sub>, 5.6 glucose, and 10 H-HEPES, pH 7.4. After bundle destruction, fresh  
619 external solution was given to re-establish the corresponding extracellular ionic environment. Two  
620 external solutions were used: 3 mM Ca<sup>2+</sup> solution containing (in mM) 144 NaCl, 0.7 NaH<sub>2</sub>PO<sub>4</sub>, 5.8 KCl,  
621 3 CaCl<sub>2</sub>, 0.9 MgCl<sub>2</sub>, 5.6 glucose, and 10 H-HEPES, pH 7.4; and 35 mM Ca<sup>2+</sup> solution containing (in mM)  
622 80 NaCl, 0.7 NaH<sub>2</sub>PO<sub>4</sub>, 5.8 KCl, 35 CaCl<sub>2</sub>, 0.9 MgCl<sub>2</sub>, 5.6 glucose, and 10 H-HEPES, pH 7.4. Only traces  
623 with obvious single channel events were included for analyzing.

624 The sampling rate was 1 kHz for leak current recording, 50 kHz for the IV protocol and current-clamp  
625 recording, and 100 kHz for unitary channel recording. The voltage-clamp used a -70 mV holding potential,

626 and the current-clamp was held at 0 pA. Only recordings with a current baseline <20 pA in NMDG solution  
627 were used for statistical analysis.

628

### 629 **Hair cell stimulation**

630 The hair bundle was deflected by two types of mechanical stimulus, fluid jet and glass probe. The fluid  
631 jet stimulation was as described previously (Beurg et al., 2014). A 40-Hz sinusoidal wave stimulus was  
632 delivered by a 27-mm-diameter piezoelectric disc driven by a home-made piezo amplifier pipette with a  
633 tip diameter of 3–5  $\mu\text{m}$  positioned 5–10  $\mu\text{m}$  from the hair bundle to evoke maximum MET currents. For  
634 glass probe stimulation, hair bundles were deflected with a glass pipette mounted on a P-885 piezoelectric  
635 stack actuator (Physik Instrumente, Karlsruhe, Germany). The actuator was driven with voltage steps that  
636 were low-pass filtered at 10 KHz. To avoid bundle damage caused by over-stimulation, the glass probe  
637 was shaped to have a slightly smaller diameter than the hair bundles, and the stimulation distance was 800  
638 nm for macroscopic current and 100 nm for unitary channel recording.

639

### 640 **Inhibitors, ion substitution, permeability, and perfusion**

641 In Figure 5, DHS, dTC, amiloride,  $\text{GdCl}_3$ , and  $\text{LaCl}_3$  were added as calculated to the recording solution  
642 (in mM) 144 NaCl, 0.7  $\text{NaH}_2\text{PO}_4$ , 5.8 KCl, 1.3  $\text{CaCl}_2$ , 0.9  $\text{MgCl}_2$ , 5.6 glucose, and 10 H-HEPES (pH 7.4).

643 Dose-inhibition curves were fitted with a Hill equation:

$$644 \quad I_x/I_{max} = X^h/(K^h + X^h)$$

645 Where  $K$  is the half-inhibition dose ( $\text{IC}_{50}$ ) and  $h$  is the Hill slope.  $I_{max}$  is the maximal current in control  
646 condition.



647 In Figure 6, all the ion substitution solutions were derived from a simplified external solution (in mM):  
648 147 NaCl, 1.3 CaCl<sub>2</sub>, 5.6 glucose, and 10 H-HEPES (pH 7.4). In Figure 6A, LiCl and CsCl were 150 mM,  
649 completely substituting for NaCl. In Figure 6B, the Ba<sup>2+</sup> solution was (in mM) 10 BaCl<sub>2</sub>, 137 NaCl, 1.3  
650 CaCl<sub>2</sub>, 5.6 glucose, and 10 H-HEPES (pH 7.4); the Zn<sup>2+</sup> solution was 75 ZnCl<sub>2</sub>, 75 NaCl, 1.3 CaCl<sub>2</sub>, 5.6  
651 glucose, and 10 H-HEPES (pH 7.4); the Co<sup>2+</sup> solution was 75CoCl<sub>2</sub>, 75 NaCl, 1.3 CaCl<sub>2</sub>, 5.6 glucose, and  
652 10 H-HEPES (pH 7.4); the Mg<sup>2+</sup> solution was 150 MgCl<sub>2</sub>, 5.6 glucose, and 10 H-HEPES (pH 7.4); and  
653 the Ca<sup>2+</sup> solution was 75 CaCl<sub>2</sub>, 75 NaCl, 5.6 glucose, and 10 H-HEPES (pH 7.4).

654 Ca<sup>2+</sup> permeability was measured by performing whole-cell voltage-clamp recording on P6 OHCs, with  
655 intracellular solution contains (in mM): 140 CsCl, 1 MgCl<sub>2</sub>, 0.1 EGTA, 2 Mg-ATP, 0.3 Na-GTP, and 10  
656 H-HEPES, pH 7.2. A voltage ramp stimulation from -120 to 80 mV lasting for 2 seconds was applied to  
657 calculate the reversal potential. For measuring Na<sup>+</sup> permeability, OHCs were perfused with the external  
658 solution containing (in mM): 150 NaCl, 1.3 CaCl<sub>2</sub>, 5.6 glucose and 10 H-HEPES. For measurement of  
659 Ca<sup>2+</sup> or Mg<sup>2+</sup> permeability, 150 NaCl will be substituted to 75 Ca<sup>2+</sup> or 75 Mg<sup>2+</sup> supplemented with 75  
660 NMDG<sup>+</sup>. In order to eliminate the influence of technical leak, an identical voltage ramp stimulation was  
661 applied on each recorded OHC in 150 NMDG. The part of inward current trace was fitted linearly to  
662 calculate the voltage value cross point between interest of ion and NMDG solution, which represented the  
663 reverse potential of the leak between this ion and Cs<sup>+</sup>. The relative permeability of monovalent cation was  
664 calculated as described (Hille)

665 
$$P_X/P_{Cs} = [Cs]_i \exp(E_{rev}F/RT)/[X]_o$$

666 And for divalent cations, the equation was:

667 
$$P_X/P_{Cs} = \gamma_{Cs}[Cs]_i \exp(E_{rev}F/RT)[\exp(E_{rev}F/RT) + 1]/4\gamma_X[X]_o$$

668 For which  $\gamma_{Cs} = 0.70$  (Hille),  $\gamma_{Ca} = 0.4657$ ,  $\gamma_{Mg} = 0.5271$  (Rodil and Vera, 2001).  $E_{rev}$  means reversal  
669 potential,  $F$  and  $R$  mean Faraday constant and gas constant,  $T$  means absolute temperature. For calculation,  
670 25°C was used as value of room temperature.

671 For the Ca-NMDG solution in Figure 6E-F, 1 CaCl<sub>2</sub> was exchanged for 2 NMDG-Cl. For the Na-Ca  
672 solution in Figures 6G, 2 NaCl was exchanged for 1 CaCl<sub>2</sub>. The osmotic pressure of each solution was re-  
673 adjusted to 300–320 mOsm/kg with sucrose, and the pH was adjusted to 7.4.

674 The gravity perfusion system (ALA-VM8, ALA Scientific Instruments, Farmingdale, NY) is controlled  
675 manually to switch and deliver solutions. The perfusion tubing and tip were modified as previously  
676 reported (Wu et al., 2005). For cochlear tissue, the perfusion tip was placed 2-3 mm from the patched hair  
677 cell and the perfusion rate was ~0.5 ml/min. Extra solution in the recording dish was removed by a  
678 peristaltic pump (PeriStar, World Precision Instruments, Sarasota, FL) to maintain a steady liquid level.

679

## 680 **Data analysis**

681 Every experiments contained at least 3 biological replicates and over 10 cell numbers, which were  
682 collected at least every 2 weeks within 3 months to keep the stability of a set of data. For certain experiment  
683 such as single channel recording, the traces number were over 100. All cell numbers were noted in the  
684 figure legends. Multiple recordings from one cell with the identical stimulus protocol were considered as  
685 technical replications, which were averaged to generate a single biological replication representing  
686 value/data from one cell. Data were managed and analyzed with Excel (Microsoft), Prism 6 (GraphPad  
687 Software, San Diego, CA), and Igor pro 6 (WaveMetrics, Lake Oswego, OR). All data are shown as mean  
688  $\pm$  SEM. Unpaired Student's t-test was applied to determine statistical significance with two-tailed P values

689 (\*p <0.05, \*\*p <0.01, \*\*\*p <0.001). Values and N numbers are defined in the figures and figure legends.

690

## 691 **ACKNOWLEDGMENTS**

692 We thank Drs Ulrich Mueller, Anthony Ricci, Bailong Xiao, Xin Liang, Wei Zhang, and members of  
693 Xiong laboratory for helpful discussions and critical proof-reading of this manuscript. This work was  
694 supported by the National Natural Science Foundation of China (31522025, 31571080, 81873703, and  
695 3181101148), Beijing Municipal Science & Technology Commission (Z181100001518001), and a startup  
696 fund from the Tsinghua University-Peking University Joint Center for Life Sciences W.X. is an awardee  
697 of the Young Thousand Talent Program of China.

698

## 699 **AUTHOR CONTRIBUTIONS**

700 S.L. did the hair-cell electrophysiology and analyzed data; S-F.W. made the constructs; L-Z.Z. performed  
701 the cochlear culture and injectoporation; J.L. performed the hair-cell electrophysiology; C.S., J.C., Q.H.,  
702 and L.L. conducted the cell culture and molecular experiments; W.X. supervised the project, designed  
703 experiments, generated figures, and wrote the manuscript.

704

## 705 **DECLARATION OF INTEREST**

706 The authors declare no competing interest.

707

## 708 **REFERENCES**

709 Assad, J.A., and Corey, D.P. (1992). An active motor model for adaptation by vertebrate hair cells. *J*

710 Neurosci 12, 3291-3309.

711 Ballesteros, A., Fenollar-Ferrer, C., and Swartz, K.J. (2018). Structural relationship between the putative  
712 hair cell mechanotransduction channel TMC1 and TMEM16 proteins. *Elife* 7.

713 Bers, D.M. (2014). Cardiac sarcoplasmic reticulum calcium leak: basis and roles in cardiac dysfunction.  
714 *Annu Rev Physiol* 76, 107-127.

715 Beurg, M., Cui, R., Goldring, A.C., Ebrahim, S., Fettiplace, R., and Kachar, B. (2018). Variable number  
716 of TMC1-dependent mechanotransducer channels underlie tonotopic conductance gradients in the cochlea.  
717 *Nat Commun* 9, 2185.

718 Beurg, M., Evans, M.G., Hackney, C.M., and Fettiplace, R. (2006). A large-conductance calcium-selective  
719 mechanotransducer channel in mammalian cochlear hair cells. *J Neurosci* 26, 10992-11000.

720 Beurg, M., Goldring, A.C., and Fettiplace, R. (2015a). The effects of Tmc1 Beethoven mutation on  
721 mechanotransducer channel function in cochlear hair cells. *J Gen Physiol* 146, 233-243.

722 Beurg, M., Kim, K.X., and Fettiplace, R. (2014). Conductance and block of hair-cell mechanotransducer  
723 channels in transmembrane channel-like protein mutants. *J Gen Physiol* 144, 55-69.

724 Beurg, M., Xiong, W., Zhao, B., Muller, U., and Fettiplace, R. (2015b). Subunit determination of the  
725 conductance of hair-cell mechanotransducer channels. *Proc Natl Acad Sci U S A* 112, 1589-1594.

726 Corey, D.P., and Holt, J.R. (2016). Are TMCs the Mechanotransduction Channels of Vertebrate Hair Cells?  
727 *J Neurosci* 36, 10921-10926.

728 Corey, D.P., and Hudspeth, A.J. (1983). Kinetics of the receptor current in bullfrog saccular hair cells. *J*  
729 *Neurosci* 3, 962-976.

730 Corns, L.F., Jeng, J.Y., Richardson, G.P., Kros, C.J., and Marcotti, W. (2017). TMC2 Modifies Permeation  
731 Properties of the Mechanoelectrical Transducer Channel in Early Postnatal Mouse Cochlear Outer Hair  
732 Cells. *Front Mol Neurosci* 10, 326.

733 Corns, L.F., Johnson, S.L., Kros, C.J., and Marcotti, W. (2014). Calcium entry into stereocilia drives  
734 adaptation of the mechanoelectrical transducer current of mammalian cochlear hair cells. *P Natl Acad Sci*  
735 *USA* 111, 14918-14923.

736 Corns, L.F., Johnson, S.L., Kros, C.J., and Marcotti, W. (2016). Tmc1 Point Mutation Affects Ca<sup>2+</sup>  
737 Sensitivity and Block by Dihydrostreptomycin of the Mechanoelectrical Transducer Current of Mouse  
738 Outer Hair Cells. *J Neurosci* 36, 336-349.

739 Edelstein, A., Amodaj, N., Hoover, K., Vale, R., and Stuurman, N. (2010). Computer control of  
740 microscopes using microManager. *Curr Protoc Mol Biol* Chapter 14, Unit14 20.

741 Effertz, T., Becker, L., Peng, A.W., and Ricci, A.J. (2017). Phosphoinositol-4,5-Bisphosphate Regulates  
742 Auditory Hair-Cell Mechanotransduction-Channel Pore Properties and Fast Adaptation. *J Neurosci* 37,  
743 11632-11646.

744 Enyedi, P., and Czirjak, G. (2010). Molecular background of leak K<sup>+</sup> currents: two-pore domain potassium  
745 channels. *Physiol Rev* 90, 559-605.

746 Farris, H.E., LeBlanc, C.L., Goswami, J., and Ricci, A.J. (2004). Probing the pore of the auditory hair cell  
747 mechanotransducer channel in turtle. *J Physiol* 558, 769-792.

748 Guo, Y., Wang, Y., Zhang, W., Meltzer, S., Zanini, D., Yu, Y., Li, J., Cheng, T., Guo, Z., Wang, Q., *et al.*  
749 (2016). Transmembrane channel-like (tmc) gene regulates *Drosophila* larval locomotion. *Proc Natl Acad*  
750 *Sci U S A* 113, 7243-7248.

751 He, L., Gulyanon, S., Mihovilovic Skanata, M., Karagyozev, D., Heckscher, E.S., Krieg, M., Tsechpenakis,  
752 G., Gershow, M., and Tracey, W.D., Jr. (2019). Direction Selectivity in Drosophila Proprioceptors  
753 Requires the Mechanosensory Channel Tmc. *Curr Biol* 29, 945-956 e943.

754 Hille, B. *Ion Channels of Excitable Membranes*, Third Edition edn (Sinauer Associates).

755 Johnson, S.L., Kennedy, H.J., Holley, M.C., Fettiplace, R., and Marcotti, W. (2012). The resting transducer  
756 current drives spontaneous activity in prehearing mammalian cochlear inner hair cells. *J Neurosci* 32,  
757 10479-10483.

758 Kawashima, Y., Geleoc, G.S., Kurima, K., Labay, V., Lelli, A., Asai, Y., Makishima, T., Wu, D.K., Della  
759 Santina, C.C., Holt, J.R., and Griffith, A.J. (2011). Mechanotransduction in mouse inner ear hair cells  
760 requires transmembrane channel-like genes. *J Clin Invest* 121, 4796-4809.

761 Kawashima, Y., Kurima, K., Pan, B., Griffith, A.J., and Holt, J.R. (2015). Transmembrane channel-like  
762 (TMC) genes are required for auditory and vestibular mechanosensation. *Pflugers Arch* 467, 85-94.

763 Kim, K.X., and Fettiplace, R. (2013). Developmental changes in the cochlear hair cell mechanotransducer  
764 channel and their regulation by transmembrane channel-like proteins. *J Gen Physiol* 141, 141-148.

765 Kimitsuki, T., Nakagawa, T., Hisashi, K., Komune, S., and Komiyama, S. (1996). Gadolinium blocks  
766 mechano-electric transducer current in chick cochlear hair cells. *Hear Res* 101, 75-80.

767 Kunzelmann, K., Cabrita, I., Wanitchakool, P., Ousingsawat, J., Sirianant, L., Benedetto, R., and Schreiber,  
768 R. (2016). Modulating Ca(2)(+) signals: a common theme for TMEM16, Ist2, and TMC. *Pflugers Arch*  
769 468, 475-490.

770 Kurima, K., Ebrahim, S., Pan, B., Sedlacek, M., Sengupta, P., Millis, B.A., Cui, R., Nakanishi, H.,  
771 Fujikawa, T., Kawashima, Y., *et al.* (2015). TMC1 and TMC2 Localize at the Site of Mechanotransduction  
772 in Mammalian Inner Ear Hair Cell Stereocilia. *Cell Rep* 12, 1606-1617.

773 Lu, B., Su, Y., Das, S., Liu, J., Xia, J., and Ren, D. (2007). The neuronal channel NALCN contributes  
774 resting sodium permeability and is required for normal respiratory rhythm. *Cell* 129, 371-383.

775 Marcotti, W., Erven, A., Johnson, S.L., Steel, K.P., and Kros, C.J. (2006). Tmc1 is necessary for normal  
776 functional maturation and survival of inner and outer hair cells in the mouse cochlea. *J Physiol* 574, 677-  
777 698.

778 Marcotti, W., Johnson, S.L., Holley, M.C., and Kros, C.J. (2003). Developmental changes in the  
779 expression of potassium currents of embryonic, neonatal and mature mouse inner hair cells. *J Physiol* 548,  
780 383-400.

781 Pan, B., Akyuz, N., Liu, X.-P., Asai, Y., Nist-Lund, C., Kurima, K., Derfler, B.H., György, B., Limapichat,  
782 W., Walujkar, S., *et al.* (2018). TMC1 Forms the Pore of Mechanosensory Transduction Channels in  
783 Vertebrate Inner Ear Hair Cells. *Neuron* 99, 736-753.e736.

784 Pan, B., Geleoc, G.S., Asai, Y., Horwitz, G.C., Kurima, K., Ishikawa, K., Kawashima, Y., Griffith, A.J.,  
785 and Holt, J.R. (2013). TMC1 and TMC2 are components of the mechanotransduction channel in hair cells  
786 of the mammalian inner ear. *Neuron* 79, 504-515.

787 Ricci, A.J., Crawford, A.C., and Fettiplace, R. (2003). Tonotopic variation in the conductance of the hair  
788 cell mechanotransducer channel. *Neuron* 40, 983-990.

789 Rodil, E., and Vera, J.H. (2001). Individual activity coefficients of chloride ions in aqueous solutions of  
790 MgCl<sub>2</sub>, CaCl<sub>2</sub> and BaCl<sub>2</sub> at 298.2 K. *Fluid Phase Equilib* 187, 15-27.

791 Vreugde, S., Erven, A., Kros, C.J., Marcotti, W., Fuchs, H., Kurima, K., Wilcox, E.R., Friedman, T.B.,

- 792 Griffith, A.J., Balling, R., *et al.* (2002). Beethoven, a mouse model for dominant, progressive hearing loss  
793 DFNA36. *Nat Genet* 30, 257-258.
- 794 Waguespack, J., Salles, F.T., Kachar, B., and Ricci, A.J. (2007). Stepwise morphological and functional  
795 maturation of mechanotransduction in rat outer hair cells. *J Neurosci* 27, 13890-13902.
- 796 Wang, X., Li, G., Liu, J., Liu, J., and Xu, X.Z. (2016). TMC-1 Mediates Alkaline Sensation in *C. elegans*  
797 through Nociceptive Neurons. *Neuron* 91, 146-154.
- 798 Wu, B., Wang, Y.M., Xiong, W., Zheng, L.H., Fu, C.L., Bruce, I.C., Zhang, C., and Zhou, Z. (2005).  
799 Optimization of a multi-channel puffer system for rapid delivery of solutions during patch-clamp  
800 experiments. *Front Biosci* 10, 761-767.
- 801 Wu, Z., and Muller, U. (2016). Molecular Identity of the Mechanotransduction Channel in Hair Cells: Not  
802 Quiet There Yet. *J Neurosci* 36, 10927-10934.
- 803 Xiong, W., Grillet, N., Elledge, H.M., Wagner, T.F., Zhao, B., Johnson, K.R., Kazmierczak, P., and Muller,  
804 U. (2012). TMHS is an integral component of the mechanotransduction machinery of cochlear hair cells.  
805 *Cell* 151, 1283-1295.
- 806 Xiong, W., Wagner, T., Yan, L., Grillet, N., and Muller, U. (2014). Using injectoporation to deliver genes  
807 to mechanosensory hair cells. *Nat Protoc* 9, 2438-2449.
- 808 Xiong, W., and Xu, Z. (2018). *Mechanotransduction of the Hair Cell* (Springer Singapore).
- 809 Yue, X., Zhao, J., Xiao, L., Fan, Y., Duan, D., Zhang, X., Zou, W.J., Sheng, Y., Zhang, T., Yang, Q., *et al.*  
810 (2018). TMC Proteins Modulate Egg Laying and Membrane Excitability through a Background Leak  
811 Conductance in *C. elegans*. *Neuron* 97, 1-15.
- 812 Zhang, L., Gualberto, D.G., Guo, X., Correa, P., Jee, C., and Garcia, L.R. (2015). TMC-1 attenuates *C.*  
813 *elegans* development and sexual behaviour in a chemically defined food environment. *Nat Commun* 6,  
814 6345.
- 815 Zhang, Y.V., Aikin, T.J., Li, Z., and Montell, C. (2016). The Basis of Food Texture Sensation in *Drosophila*.  
816 *Neuron* 91, 863-877.
